# Supplementary material
Source: ML conference proceedings conference paper supplement (https://openreview.net/forum?id=XDYcMtLHEr)
Supplement: supplementary_material [file attachment]

## REFERENCES

- Ben Bogin, Mor Geva, and Jonathan Berant. Emergence of communication in an interactive world with consistent speakers. *arXiv preprint arXiv:1809.00549*, 2018.
- Rahma Chaabouni, Eugene Kharitonov, Emmanuel Dupoux, and Marco Baroni. Anti-efficient encoding in emergent communication. *Advances in Neural Information Processing Systems*, 32, 2019.
- Rahma Chaabouni, Eugene Kharitonov, Diane Bouchacourt, Emmanuel Dupoux, and Marco Baroni. Compositionality and generalization in emergent languages. In Dan Jurafsky, Joyce Chai, Natalie Schluter, and Joel Tetreault (eds.), *Proceedings of the 58th Annual Meeting of the Association for Computational Linguistics*, pp. 4427–4442, Online, July 2020. Association for Computational Linguistics. doi: 10.18653/v1/2020.acl-main.407. URL <https://aclanthology.org/2020.acl-main.407>.
- Rahma Chaabouni, Florian Strub, Florent Alth  , Eugene Tarassov, Corentin Tallec, Elnaz Davoodi, Kory Wallace Mathewson, Olivier Tieleman, Angeliki Lazaridou, and Bilal Piot. Emergent communication at scale. In *International Conference on Learning Representations*, 2022. URL <https://openreview.net/forum?id=AUGBfDIV9rL>.
- Elliot Chane-Sane, Cordelia Schmid, and Ivan Laptev. Goal-conditioned reinforcement learning with imagined subgoals. In *International Conference on Machine Learning*, pp. 1430–1440. PMLR, 2021.
- Edward Choi, Angeliki Lazaridou, and Nando de Freitas. Compositional overver communication learning from raw visual input. In *International Conference on Learning Representations*, 2018.
- Roberto Dessi, Eugene Kharitonov, and Baroni Marco. Interpretable agent communication from scratch (with a generic visual processor emerging on the side). In M. Ranzato, A. Beygelzimer, Y. Dauphin, P.S. Liang, and J. Wortman Vaughan (eds.), *Advances in Neural Information Processing Systems*, volume 34, pp. 26937–26949. Curran Associates, Inc., 2021. URL [https://proceedings.neurips.cc/paper\\_files/paper/2021/file/e250c59336b505ed411d455abaa30b4d-Paper.pdf](https://proceedings.neurips.cc/paper_files/paper/2021/file/e250c59336b505ed411d455abaa30b4d-Paper.pdf).
- Katrina Evtimova, Andrew Drozdov, Douwe Kiela, and Kyunghyun Cho. Emergent communication in a multi-modal, multi-step referential game. In *6th International Conference on Learning Representations, ICLR 2018*, 2018.
- Jakob Foerster, Ioannis Alexandros Assael, Nando De Freitas, and Shimon Whiteson. Learning to communicate with deep multi-agent reinforcement learning. *Advances in neural information processing systems*, 29, 2016.
- Lukas Galke, Yoav Ram, and Limor Raviv. Emergent communication for understanding human language evolution: What’s missing? In *Emergent Communication Workshop at ICLR 2022*, 2022.
- Laura Graesser, Kyunghyun Cho, and Douwe Kiela. Emergent linguistic phenomena in multi-agent communication games. In *2019 Conference on Empirical Methods in Natural Language Processing and 9th International Joint Conference on Natural Language Processing, EMNLP-IJCNLP 2019*, pp. 3700–3710. Association for Computational Linguistics, 2019.
- Jean-Bastien Grill, Florian Strub, Florent Alth  , Corentin Tallec, Pierre Richemond, Elena Buchatskaya, Carl Doersch, Bernardo Avila Pires, Zhaohan Guo, Mohammad Gheshlaghi Azar, et al. Bootstrap your own latent-a new approach to self-supervised learning. *Advances in neural information processing systems*, 33:21271–21284, 2020.
- Shangmin Guo, Yi Ren, Serhii Havrylov, Stella Frank, Ivan Titov, and Kenny Smith. The emergence of compositional languages for numeric concepts through iterated learning in neural agents. *arXiv preprint arXiv:1910.05291*, 2019.
- Serhii Havrylov and Ivan Titov. Emergence of language with multi-agent games: Learning to communicate with sequences of symbols. *Advances in neural information processing systems*, 30, 2017.

- Kaiming He, Xiangyu Zhang, Shaoqing Ren, and Jian Sun. Deep residual learning for image recognition. In *Proceedings of the IEEE conference on computer vision and pattern recognition*, pp. 770–778, 2016.
- Sepp Hochreiter and Jürgen Schmidhuber. Long short-term memory. *Neural computation*, 9(8): 1735–1780, 1997.
- Eric Jang, Shixiang Gu, and Ben Poole. Categorical reparameterization with gumbel-softmax. *arXiv preprint arXiv:1611.01144*, 2016.
- Emilio Jorge, Mikael Kågebäck, Fredrik D Johansson, and Emil Gustavsson. Learning to play guess who? and inventing a grounded language as a consequence. *arXiv preprint arXiv:1611.03218*, 2016.
- Tomasz Korbak, Julian Zubek, and Joanna Rączaszek-Leonardi. Measuring non-trivial compositionality in emergent communication. *arXiv preprint arXiv:2010.15058*, 2020.
- Łukasz Kuciński, Tomasz Korbak, Paweł Kołodziej, and Piotr Miłoś. Catalytic role of noise and necessity of inductive biases in the emergence of compositional communication. *Advances in Neural Information Processing Systems*, 34:23075–23088, 2021.
- Angeliki Lazaridou, Alexander Peysakhovich, and Marco Baroni. Multi-agent cooperation and the emergence of (natural) language. In *International Conference on Learning Representations*, 2017. URL <https://openreview.net/forum?id=Hk8N3Sclg>.
- David Lewis. Scorekeeping in a language game. *Journal of Philosophical Logic*, 8(1):339–359, Jan 1979. ISSN 1573-0433. doi: 10.1007/BF00258436. URL <https://doi.org/10.1007/BF00258436>.
- Fushan Li and Michael Bowling. Ease-of-teaching and language structure from emergent communication. In H. Wallach, H. Larochelle, A. Beygelzimer, F. d’Alché-Buc, E. Fox, and R. Garnett (eds.), *Advances in Neural Information Processing Systems*, volume 32. Curran Associates, Inc., 2019. URL [https://proceedings.neurips.cc/paper\\_files/paper/2019/file/b0cf188d74589db9b23d5d277238a929-Paper.pdf](https://proceedings.neurips.cc/paper_files/paper/2019/file/b0cf188d74589db9b23d5d277238a929-Paper.pdf).
- Ziwei Liu, Ping Luo, Xiaogang Wang, and Xiaoou Tang. Deep learning face attributes in the wild. In *Proceedings of International Conference on Computer Vision (ICCV)*, December 2015.
- Ilya Loshchilov and Frank Hutter. Decoupled weight decay regularization. *arXiv preprint arXiv:1711.05101*, 2017.
- Igor Mordatch and Pieter Abbeel. Emergence of grounded compositional language in multi-agent populations. In *Proceedings of the AAAI conference on artificial intelligence*, volume 32, 2018.
- Aaron van den Oord, Yazhe Li, and Oriol Vinyals. Representation learning with contrastive predictive coding. *arXiv preprint arXiv:1807.03748*, 2018.
- Razvan Pascanu, Tomas Mikolov, and Yoshua Bengio. On the difficulty of training recurrent neural networks. In *International conference on machine learning*, pp. 1310–1318. Pmlr, 2013.
- David Premack and Guy Woodruff. Does the chimpanzee have a theory of mind? *Behavioral and brain sciences*, 1(4):515–526, 1978.
- Shuwen Qiu, Sirui Xie, Lifeng Fan, Tao Gao, Jungseock Joo, Song-Chun Zhu, and Yixin Zhu. Emergent graphical conventions in a visual communication game. *Advances in Neural Information Processing Systems*, 35:13119–13131, 2022.
- Konrad Rawlik, Marc Toussaint, and Sethu Vijayakumar. On stochastic optimal control and reinforcement learning by approximate inference. *Proceedings of Robotics: Science and Systems VIII*, 2012.
- Yi Ren, Shangmin Guo, Matthieu Labeau, Shay B. Cohen, and Simon Kirby. Compositional languages emerge in a neural iterated learning model. In *International Conference on Learning Representations*, 2020. URL <https://openreview.net/forum?id=HkePNpVKPB>.

- Mathieu Rita, Rahma Chaabouni, and Emmanuel Dupoux. “LazImpa”: Lazy and impatient neural agents learn to communicate efficiently. In *Proceedings of the 24th Conference on Computational Natural Language Learning*, pp. 335–343, Online, November 2020. Association for Computational Linguistics. doi: 10.18653/v1/2020.conll-1.26. URL <https://aclanthology.org/2020.conll-1.26>.
- Mathieu Rita, Florian Strub, Jean-Bastien Grill, Olivier Pietquin, and Emmanuel Dupoux. On the role of population heterogeneity in emergent communication. In *International Conference on Learning Representations*, 2022. URL <https://openreview.net/forum?id=5Qkd7-bZfI>.
- Olga Russakovsky, Jia Deng, Hao Su, Jonathan Krause, Sanjeev Satheesh, Sean Ma, Zhiheng Huang, Andrej Karpathy, Aditya Khosla, Michael Bernstein, Alexander C. Berg, and Li Fei-Fei. ImageNet Large Scale Visual Recognition Challenge. *International Journal of Computer Vision (IJCV)*, 115(3):211–252, 2015. doi: 10.1007/s11263-015-0816-y.
- John Schulman, Filip Wolski, Prafulla Dhariwal, Alec Radford, and Oleg Klimov. Proximal policy optimization algorithms. *arXiv preprint arXiv:1707.06347*, 2017.
- Sainbayar Sukhbaatar, Rob Fergus, et al. Learning multiagent communication with backpropagation. *Advances in neural information processing systems*, 29, 2016.
- Mycal Tucker, Huao Li, Siddharth Agrawal, Dana Hughes, Katia Sycara, Michael Lewis, and Julie A Shah. Emergent discrete communication in semantic spaces. *Advances in Neural Information Processing Systems*, 34:10574–10586, 2021.
- Ryo Ueda and Koki Washio. On the relationship between Zipf’s law of abbreviation and interfering noise in emergent languages. In *Proceedings of the 59th Annual Meeting of the Association for Computational Linguistics and the 11th International Joint Conference on Natural Language Processing: Student Research Workshop*, pp. 60–70, Online, August 2021. Association for Computational Linguistics. doi: 10.18653/v1/2021.acl-srw.6. URL <https://aclanthology.org/2021.acl-srw.6>.
- Nino Vieillard, Tadashi Kozuno, Bruno Scherrer, Olivier Pietquin, Remi Munos, and Matthieu Geist. Leverage the average: an analysis of kl regularization in reinforcement learning. In H. Larochelle, M. Ranzato, R. Hadsell, M.F. Balcan, and H. Lin (eds.), *Advances in Neural Information Processing Systems*, volume 33, pp. 12163–12174. Curran Associates, Inc., 2020. URL [https://proceedings.neurips.cc/paper\\_files/paper/2020/file/8e2c381d4dd04f1c55093f22c59c3a08-Paper.pdf](https://proceedings.neurips.cc/paper_files/paper/2020/file/8e2c381d4dd04f1c55093f22c59c3a08-Paper.pdf).
- Ronald J Williams. Simple statistical gradient-following algorithms for connectionist reinforcement learning. *Machine learning*, 8:229–256, 1992.
- George Kingsley Zipf. *The psycho-biology of language: An introduction to dynamic philology*, volume 21. Psychology Press, 1999.
- George Kingsley Zipf. *The psycho-biology of language: An introduction to dynamic philology*. Routledge, 2013.

## A EXTENDED RELATED WORK

One of the core properties of emergent communication is that agents learn a communication protocol on their own, where coordination is needed to solve a task. The study of emergent communication with neural agents started with continuous communication channels during training. (Sukhbaatar et al., 2016) propose a communication channel that shares continuous vectors where each agent receives a combination of all messages broadcasted by all other agents. Jorge et al. (2016) proposed a recurrent version of the Lewis Game with continuous messages. While such works have good performances, they benefit from having differential communication channels, making it possible for gradients to pass through. Havrylov & Titov (2017); Mordatch & Abbeel (2018); Guo et al. (2019); Chaabouni et al. (2020); Rita et al. (2022) used a formulation of the Lewis Game to study emergent communication, where messages also contain discrete tokens but still allow for gradients to pass through the communication channel. As such, these methods employ a DIAL paradigm (Foerster et al., 2016), allowing for an end-to-end training scheme (across agents) by sampling discrete tokens using straight-through Gumbel-Softmax estimator (Jang et al., 2016). From a natural language perspective, these approaches do not fully align with the properties of human communication, which is discrete and undifferentiable.

Other approaches, similarly to our work, close the gap to human language by using discrete channels to communicate at training and execution times, meaning gradients do not flow through the channel. In this case, we have a RIAL approach where each agent perceives others as part of the environment. In most cases, these works rely on a variation of Reinforce (Williams, 1992) to model the Speaker and Listener, where both agents try to maximize the game’s reward. Primarily, Foerster et al. (2016); Lazaridou et al. (2017) developed discrete communication channels composed of only one symbol. The former study designed games where two agents simultaneously have the Speaker and Listener roles to classify images. Nevertheless, the architecture having independent agents performed poorly for the mentioned task, when compared to a DIAL approach. The latter work implemented a simpler version of the Lewis Game where the Listener discriminates between two images. The Speaker also has information about the images that the Listener will receive. Choi et al. (2018) further extended the latter game design creating agents that can handle messages composed of multiple discrete symbols, called the *Obverter* technique. The authors accomplish this by modeling the Speaker to choose the message that maximizes the Speaker’s understanding. This assumption roots the theory of mind (Premack & Woodruff, 1978), where the Speaker assumes the Listener’s mind and its own are identical. Although this work is an improvement from past works regarding the emulation of human language, there are still severe limitations. For example, the environment considered has only two effective degrees of freedom that must be modeled (shape and color of simple 3D shapes), limiting severely input diversity.

New extensions to the Obverter focus on studying specific properties of human language, like compositionality or pragmatics. Ren et al. (2020) developed an iterated learning strategy for the Lewis Game, trying to create highly compositional languages as a consequence of developing a new language protocol by having several distinct learning phases for each agent. From a linguistics perspective, compositionality is crucial since it encourages the expression of complex concepts through simpler ones. Another approach tries to leverage a population of agents to study its effect on simplifying the emerged language (Graesser et al., 2019). The authors use a simple visual task where agents communicate binary messages through a fixed number of rounds to match an image to a caption. The image depicts a simple shape with a specific color. Since each agent observes only part of the image, they must cooperate to solve the task. Li & Bowling (2019) also considers a variation of the Lewis Game with a discrete communication channel. The main objective is to give another perspective on how to evaluate the structure of the resulting communication protocol, giving experimental evidence that compositional languages are easier to teach to new Listeners. This additional external pressure surfaces when the Speaker interacts with new Listeners during training. The proposed experiments continue in the same line of simplicity since inputs are categorical values with two attributes, messages contain only two tokens, and the number of candidates the Listener discriminates is only five objects.

As a succeeding work, Chaabouni et al. (2022) proposed scaling several dimensions of the Lewis Game to create a setup closer to simulating human communication. Compared to the previous works, this study tries to scale several dimensions of the Lewis Game: the number of candidates received by the Listener, the dataset of images used, and the number of learning agents. Scaling

such dimensions makes the referential game more complex, promoting the generality and validity of the experimental results. Moreover, this study also suggests that compositionality is not a natural emergent factor of generalization of a language as the environment becomes more complex (e.g., using real-world images). This work can be seen as the initial starting point of our proposed work. In particular, we follow this game setup and extensively make more challenging environments where we add a time dependency and a stochastic communication channel. We argue that having a multi-step environment and a noisy communication channel enables learning more general and robust communication protocols.

There are few works in the literature that take into account noise in the communication channel. Tucker et al. (2021); Kuciński et al. (2021) apply a DIAL scheme, where the noise is sampled and added in the continuous space before applying the Gumbel-Softmax trick. As such, the problem is simplified by learning a continuous latent space robust to noise. More closely related to our work is the study presented by Ueda & Washio (2021). In such work, we are in an emergent discrete communication setting where the authors use a noisy communication channel to test the Zipf’s law of abbreviation (Zipf, 2013). As such, the goal is to investigate conditions for which common messages become shorter. In this context, the authors propose an adversarial setting to try to deceive the Listener by giving another plausible message (different from the Speaker’s message), which, as training progresses, promotes the usage of shorter messages. Our method differs from this work since we assume the communication channel can suffer external perturbations, mimicking the loss of information. In our case, we apply noise by changing the corresponding token to a pre-defined token called the *unknown* token. Therefore, we are interested in evaluating the communication protocols’ robustness to handle different noise levels at test time. Additionally, our referential games are more complex since we use datasets with natural images for discrimination instead of categorical inputs.

Another particular extension related to our work is the introduction of multiple message transmissions before the Listener makes a final prediction (Evtimova et al., 2018; Qiu et al., 2022; Bogin et al., 2018). In particular, Evtimova et al. (2018) introduced a new referential game with a bidirectional communication channel. Even though the exchange of information between the Speaker and Listener happens in both directions, the amount of information is reduced since messages are binary vectors and have a fixed length. The Listener’s task also adapts to this setting since only one candidate can be predicted in each game round. Compared to our proposed multi-round referential game (MRILG), we only allow information to flow from the Speaker to the Listener. However, the vocabulary we use comprises of discrete tokens, increasing combinatorially the amount of information transmitted. Further complexity also arises by having our Listener agent discriminate all candidates simultaneously in each game round played. Bogin et al. (2018) introduced environments where communication happens during long-horizon tasks based on grid worlds. To compensate for the stochasticity of the environment, especially at the beginning of the training phase, the authors proposed restricting the Speaker’s learning to be more consistent in related conditions. By having a pre-trained scoring function for the environment’s goal, the Speaker will have the additional objective of composing messages yielding a similar score to the goal score. Learning a new score for each new environment can be time-consuming, and this approach will also limit the Speaker’s search space that can be explored when learning the communication protocol. In comparison to our work, we do not limit the exploration capability of the Speaker but force the Speaker to be agnostic to the current round since our main focus is to study how different Listener architectures impact the emergent language. Further, our input distribution is also more complex than in the mentioned work, since we use real-world images as input. Finally, we would like to point out that the work of Qiu et al. (2022) introduces a game with similar dynamics to our MRILG game, where at each round the Listener can decide to play another round or make a final prediction given the set of candidates. Nonetheless, there are still fundamental differences between both approaches. Both studies have different objectives since our games emulate discrete communication channels, and the authors’ objective is to communicate drawings by sending continuous strokes. Complementarily, Qiu et al. (2022) simplify the coordination problem by using a DIAL approach. In contrast, our method uses a RIAL approach, where, in this case, the Speaker does not know that the message is being modified, complicating the coordination task.

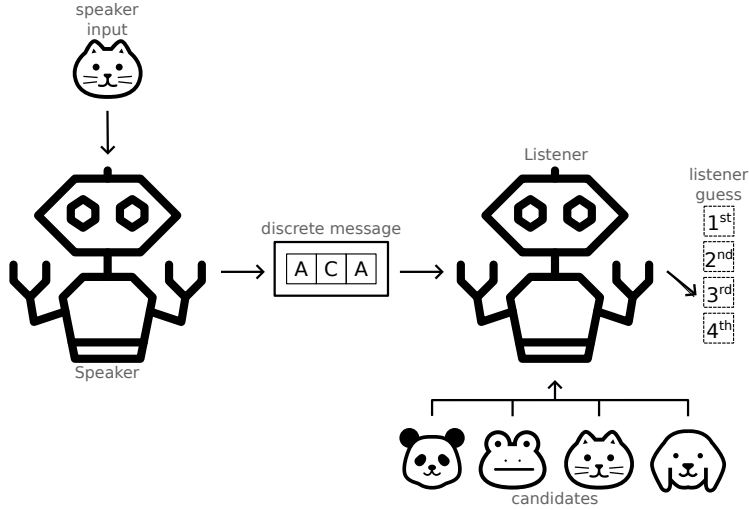

Figure 3: Visual Representation of the Lewis Game (LG).

## B LEWIS GAME VARIANTS

For completeness and to have a self-contained study, we now give additional information regarding every LG variant implemented.

### B.1 LEWIS GAME (LG)

The original LG is a discrimination game where a Speaker describes an image to the Listener by sending a message composed of discrete tokens. Afterward, the Listener uses the message to deliberate which image of the received set (candidates) was also the Speaker’s input. We give a complete description of LG in Section 2.1. Furthermore, the Figure 3 depicts a visual representation of the LG.

### B.2 NOISY LEWIS GAME (NLG)

NLG is an extension to the LG, where the communication channel stops being completely reliable, implying that messages can suffer random perturbations, see Figure 4. Similarly to the MRILG (Section 2.2), we define a noise function to convert each message’s token into a predefined unknown token given some probability. Specifically, LG is a particular implementation of NLG where the noise level,  $\lambda$  in equation 1, is always 0.

### B.3 MULTI-ROUND INDECISIVE LEWIS GAME (MRILG)

The final and most general game we present is the MRILG. This game further generalizes NLG, where agents can play multiple rounds before the Listener makes a final prediction. The Listener architecture attains a new action (*idk*) that allows the agents to play a new round instead of the Listener choosing a candidate, thus terminating the game in the latter case. A full description of MRILG appears in Section 2.2, and Figure 5 illustrates the game visually.

## C LISTENER ARCHITECTURES

We now give more information detailing the agent architectures used for each LG variant. We reiterate that the Speaker architecture remains unchanged for all games. The only agent suffering modifications between games is the Listener, to be more precise, the Listener’s head module. Hence, the base modules that process the message and candidates also remain unchanged between games. As Section 2.2.1 thoroughly explains, the token and recurrent modules ( $e(\cdot; \phi)$  and  $h(\cdot; \phi)$ ,

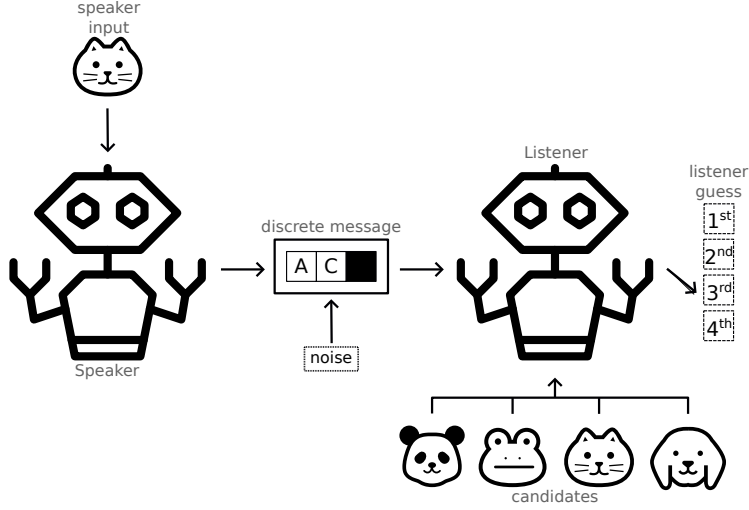

Figure 4: Visual Representation of the Noisy Lewis Game (NLG).

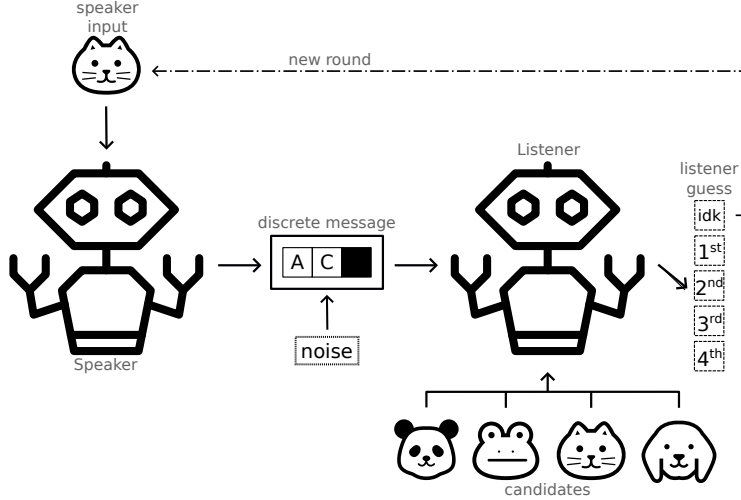Figure 5: Visual Representation of the Multi-Round Indecisive Lewis Game (MRILG). The *idk* action in the Listener’s guess stands for “I don’t know”.

respectively) convert each message token sequentially into a final hidden state  $z_{T,\phi}^{(i)}$ . Regarding the candidates, a fixed image encoder,  $f$ , converts them into compact representations. Then, two different functions,  $g$  and  $c$ , further reduce the dimensionality of the message and candidate representations, respectively. Particularly,  $g$  and  $c$  use a non-linear activation function ( $\tanh$ ) before returning the respective vectors,  $l_m^{(i)}$  and  $l_{x_j}^{(i)}$ . Finally,  $l_m^{(i)}$  and  $l_{x_j}^{(i)}$  pass through an attention mechanism to output a single vector,  $s^{(i)} = \left[ l_m^{(i)} \cdot l_{x_1} \quad \dots \quad l_m^{(i)} \cdot l_{x_{|C|}} \right]^T$ , to the Listener head containing fused information from the message and each candidate.

In order to have a frame of reference to benchmark our novel games and agent architectures, we re-implemented the Listener architecture proposed by Chaabouni et al. (2022) (original), which we call LG (SS). In this case, the Listener employs a self-supervised (SS) architecture where the head module sends the attention logits through a softmax to convert them into a distribution. The corresponding learning procedure invokes the InfoNCE loss Oord et al. (2018) to attract the message representation to the representation of the right candidate while, at the same time, repulsing all other candidates. Therefore, the SS architecture can only play in one-round LG variants since it is not straightforward or natural to encode the *idk* action. Lastly, we disclose that our LG (SS) implemen-

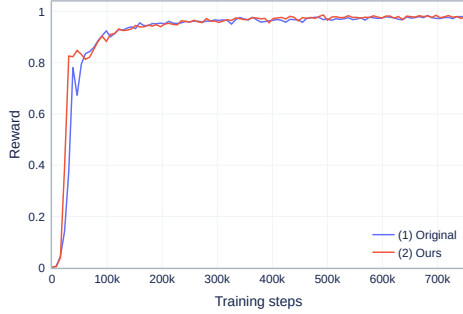

Figure 6: Accuracy during training of two implementations of LG (SS), (1) Original Chaabouni et al. (2022) and (2) Ours (Appendix C). The dataset used was ImageNet and  $|\mathbb{C}| = 1024$ .

Table 9: Test accuracy with SD for two implementations of LG (SS), (1) Original Chaabouni et al. (2022) and (2) Ours (Appendix C), using ImageNet dataset. During training  $|\mathbb{C}| = 1024$ .

| Game    | Implementation | $ \mathbb{C} $ (test) |      |
|---------|----------------|-----------------------|------|
|         |                | 1024                  | 4096 |
| LG (SS) | Original (1)   | 0.96                  | 0.88 |
| LG (SS) | Ours (2)       | 0.96                  | 0.88 |

tation differs slightly from the original implementation, where we place the tanh activation function before giving the message ( $l_m^{(i)}$ ) and candidate representations ( $l_{x_j}$ ) to the attention mechanism. Figure 6 illustrates the training procedure for both implementations, where we can see similar data efficiency since both curves jump to a mean reward (accuracy) of 0.8 before the 50k steps. Additionally, as the training step increases, both implementations converge to similar values (around 0.98). We also introduce test accuracies in Table 9, where both implementations also yield identical results.

Secondly, we implemented two novel Listener head architectures to accommodate the new proposed LG variants (LG (RL), NLG, and MRILG). All architectures differ only in the actor sub-module. As such, the critic sub-module remains unchanged, and its procedure approximates the cumulative discounted reward by supplying the attention logits,  $s^{(i)}$ , to  $v(s^{(i)}; \phi)$ . The actor sub-module used to play LG (RL) and NLG uses the softmax function to convert the attention logits,  $s^{(i)}$ , into a distribution containing the action to pick each candidate. Regarding the Listener head module implemented for the MRILG, there is an extra function,  $t(\cdot; \phi)$ , to compute the logit corresponding to the *idk* action. See Section 2.2.1 for a fully detailed description of the actor module used for MRILG.

## D ARCHITECTURE IMPLEMENTATION

Succeeding the detailed explanation of the several Listener architectures applied for each LG variant (Appendix C), we present concrete network implementations for both agents in this section.

### D.1 SPEAKER

The network implemented for the Speaker agent will receive as input an image and output a message composed of  $T$  discrete tokens, each retrieved from the same fixed vocabulary:

- $f$ : A frozen ResNet-50 (He et al., 2016) model trained with BYOL algorithm (Grill et al., 2020) on ImageNet dataset (Russakovsky et al., 2015). The output size of the resulting features is 2048.
- $g(\cdot; \theta)$ : A single linear layer to reduce the features’ dimensionality from 2048 to 512 in order to fit in the next layer, an LSTM (Hochreiter & Schmidhuber, 1997). Additionally, we divide the resulting vector into two equal parts, denoting the initial hidden,  $z_{0,\theta}$ , and cell values,  $c_{0,\theta}$ , of the LSTM.
- $e(\cdot; \theta)$ : Embedding layer to convert discrete tokens into continuous vectors. The embedding layer receives the discrete token  $u_t$ , as an integer and with size  $|\mathbb{W}| + 1$ , and outputs a feature vector  $e(u_t; \theta)$  of size 10.



- $h(\cdot; \theta)$ : Recurrent layer, implemented as a single LSTM of size 256. The initial hidden and cell states are the output of  $g(\cdot; \theta)$ . Additionally,  $h$  processes the continuous version of each message token  $e(u_{t-1}; \theta)$  iteratively. Furthermore, the computed hidden value  $z_{t,\theta}$ , in each iteration  $t$ , will be the input to the value and critics heads,  $\pi_S(\cdot|z_{t,\theta})$  and  $v(\cdot; \theta)$ , respectively.
- $\pi_S(\cdot|z_{t,\theta})$ : For a given iteration  $t$ , the actor policy head uses a linear layer (output size of  $|\mathbb{W}|$ ) followed by the softmax function to convert the hidden state  $z_{t,\theta}$  into a categorical distribution  $\text{Cat}(|\mathbb{W}|, \pi_S(\cdot|z_{t,\theta}))$ , where each value indicates the probability of choosing each token as the next one to add to the message,  $u_t$ .
- $v(\cdot; \theta)$ : Critic value head to estimate the expected value, in this case, the reward received for the current round  $R(\mathbf{x}, \hat{\mathbf{x}})$ , by implementing a linear layer with an output size of 1. When playing the MRILG, there is a different reward for each round:  $R(\mathbf{x}, \hat{\mathbf{x}}^{(i)}, i)$

## D.2 LISTENER

The Listener architecture has two input entries to acquire the Speaker’s message and the set of candidate images. This architecture suffers internal modifications to adapt to the specifications of the LG variant to play. Moreover, it is also possible to create different Listener architectures to solve the same game as we show in Appendix C, where we have SS and RL Listener architectures to play the LG. Hence, we first detail the implementation of common modules used in every Listener architecture. These sub-modules are the message and candidates’ sub-modules used to extract information from the message and candidates, respectively. Afterward, we detail the sub-module specific to each different Listener, labeled as the *Listener’s head*. As a brief remark, we omit superscripts describing the round index from all variables since all games, except MRILG, have a duration of only one round, and extending to the multi-round case is straightforward.

### D.2.1 COMMON SUB-MODULES

We describe every network implementation contained in the common Listener’s sub-modules (message and candidates sub-modules):

- $f$  (*candidates*): A frozen ResNet-50 trained with BYOL on the ImageNet dataset, where  $f$  converts the image into a vector with 2048 features.  $f$  is the same network used in the Speaker architecture, see Appendix D.1.
- $c(\cdot; \phi)$  (*candidates*): This single linear layer, followed by the tanh function, receives each candidate’s feature vector  $\mathbf{l}_{x_i} = c(f(\mathbf{x}_i); \phi)$  to reduce its dimensionality from 2048 to 256.
- $e(\cdot; \phi)$  (*message*): A single embedding layer to convert a discrete message token  $u_t$  into a continuous vector of size 10.  $e(\cdot; \phi)$  is equal to the Speaker’s layers  $e(\cdot; \theta)$  but parametrized with a different set of parameters,  $\phi$ .
- $h(\cdot; \phi)$  (*message*): An LSTM layer with a size of 512, receiving the continuous features of each message token  $e(u_t; \phi)$  iteratively. The initial hidden  $z_{0,\phi}$  and cell states  $c_{0,\phi}$  are both 0.
- $g(\cdot; \phi)$  (*message*): Linear layer followed by the tanh function to reduce the dimensionality of the last hidden state value  $z_{T,\phi}$  from a vector size 512 to 256, denoted as  $\mathbf{l}_m$ .

### D.2.2 LG (SS)

Upon the message and candidate sub-modules outputting the respective hidden values,  $\mathbf{l}_m$  and  $\mathbf{l}_{x_j}$ , respectively, the SS Listener architecture computes a single value score between  $\mathbf{l}_m$  and each  $\mathbf{l}_{x_j}$ , using the cosine similarity function (non-parameter function),  $\cos\_sim = \mathbf{l}_m \cdot \mathbf{l}_{x_j} / (\|\mathbf{l}_m\| \|\mathbf{l}_{x_j}\|)$ . Following this step, the similarity outputs pass through a softmax function, yielding a categorical distribution suitable to apply InfoNCE loss (Oord et al., 2018).

### D.2.3 LG (RL) & NLG

The Listener’s head architecture for both LG (RL) and NLG has the same structure:

- $s$ : Non-parametrizable function to combine information coming from the received message and candidate set. The attention mechanism  $s$  happens through a dot product between  $\mathbf{l}_m$ , and each  $\mathbf{l}_{x_j}$ , defined as  $\mathbf{s} = [\mathbf{l}_m \cdot \mathbf{l}_{x_1} \quad \dots \quad \mathbf{l}_m \cdot \mathbf{l}_{x_{|\mathbb{C}|}}]^T$ .
- $\pi_L(\cdot | \mathbf{s})$ :  $\pi_L$  corresponds to the Listener’s head actor head and contains the softmax function to convert the logits  $\mathbf{s}$  into a categorical distribution  $\text{Cat}(|\mathbb{C}|, \pi_L(\cdot | \mathbf{s}))$ . Each distribution value maps the probability of choosing the candidate with the same index  $\pi_L(i | \mathbf{s}_\phi)$ , where  $i \in \{1, \dots, |\mathbb{C}|\}$ .
- $v(\cdot ; \phi)$ : The Listener’s critic head  $v$  receives the attention logits  $\mathbf{s}$  and passes them through a multi-layer perceptron (MLP), outputting a one-dimension value corresponding to a prediction of the reward  $R(\mathbf{x}, \hat{\mathbf{x}})$  for the associated game. The hidden and output sizes of the MLP are  $(\max(|\mathbb{C}|/4, 4), \max(|\mathbb{C}|/16, 2), 1)$ , and the activation function used in the hidden layers is the ReLU function.

#### D.2.4 MRILG

For the multi-round game (MRILG), the Listener’s head architecture is slightly different. In this case, we also need to model the additional *idk* action to explicitly encode the ability to keep playing the game through succeeding rounds. Thus, we slightly modify the Listener’s actor head  $\pi_L$  where we add a linear layer,  $t(\cdot ; \phi)$ , to receive  $\mathbf{s}^{(i)}$  and output a single logit associated with the *idk* action,  $s_{\text{idk}}^{(i)}$ . As such, the softmax function receives the resulting concatenation of  $\mathbf{s}^{(i)}$  with  $s_{\text{idk}}^{(i)}$  and returns a categorical distribution  $\text{Cat}(|\mathbb{C}| + 1, \pi_L(\cdot | \mathbf{s}^{(i)}, s_{\text{idk}}^{(i)}))$ . The new distribution models all possible Listener actions, choosing a candidate or playing the *idk* action. The critic head has the same architecture but now estimates the expected cumulative reward from the current round  $i$  until the end of the game, see equation 2.

Additionally, we also slightly adjust  $h(\cdot ; \phi)$  to ensure dependencies between rounds and allow the Listener to have access to information from prior rounds. In this case, the initial hidden and cell values,  $\mathbf{z}_{0,\phi}^{(i)}$  and  $\mathbf{c}_{0,\phi}^{(i)}$ , where  $i > 0$ , are not  $\mathbf{0}$ , but have the final values obtained during the previous round,  $\mathbf{z}_{T,\phi}^{(i-1)}$  and  $\mathbf{c}_{T,\phi}^{(i-1)}$ , respectively.

#### D.3 HYPERPARAMETERS

In this subsection, we detail the hyperparameters used to instantiate all LG experiments, exposed in Tables 10 to 12.

### E TRAINING DETAILS

Following the concise introduction about the learning strategy of both agents (Section 2.2.2), we now add complementary information detailing the loss functions used by both agents. We also propose an ablation study regarding essential architectural and training procedure choices given at the end of Section 2.2.2.

#### E.1 LEARNING STRATEGY

We model both agents as RL agents for the novel LG variants proposed in this study, LG (RL), NLG, and MRILG. We also follow a RIAL procedure (Foerster et al., 2016), where each agent perceives others as part of the environment, meaning no gradients flow between agents allowing us to isolate the loss function of each agent completely. We will now detail, first, the Speaker’s loss function and, secondly, the loss function used by the Listener agent.

##### E.1.1 SPEAKER

Due to the Speaker’s role, its objective will converge on creating messages  $\mathbf{m} = (u_t)_{t=1}^T$  in such a way as to facilitate the mapping between the message and the right candidate ( $\hat{\mathbf{x}} = \mathbf{x}$ ) by the Listener. For a given round  $i$ , the Speaker, parametrized by  $\theta$ , generates messages iteratively, where the following message token results from sampling its actor’s stochastic policy,

Table 10: Common hyperparameters for all games: LG (SS), LG (RL), NLG, and MRILG. The values of hyperparameters described as a set,  $\{\cdot\}$ , means we run experiments with each value in the set.

| hyperparameter           | value                   |
|--------------------------|-------------------------|
| training steps           | 750 k                   |
| $ \mathbb{C} $           | $\{16, 64, 256, 1024\}$ |
| $ \mathcal{W} $          | 20                      |
| $T$                      | 10                      |
| $\alpha_{S,A}$           | 1                       |
| $\alpha_{S,C}$           | 1                       |
| $\alpha_{S,\mathcal{H}}$ | $1 \times 10^{-4}$      |
| $\alpha_{S,A}$           | 0.5                     |
| $\alpha_{L,A}$           | 1                       |
| $\alpha_{L,C}$           | $1 \times 10^{-3}$      |
| $\alpha_{L,\mathcal{H}}$ | $1 \times 10^{-4}$      |
| Speaker’s optim          | adam                    |
| Listener’s optim         | adam                    |
| Speaker’s optim lr       | $1 \times 10^{-4}$      |
| Listener’s optim lr      | $5 \times 10^{-5}$      |
| $\eta$                   | 0.99                    |
| $\gamma$                 | 0.99                    |

Table 11: Hyperparameters exclusive to NLG and MRILG. The values of hyperparameters described as a set,  $\{\cdot\}$ , means we run experiments with each value in the set.

| hyperparameter          | value                 |
|-------------------------|-----------------------|
| $\lambda_{\text{init}}$ | 0                     |
| $\lambda$               | $\{0.25, 0.5, 0.75\}$ |
| noise init steps        | 300 k                 |

$u_t^{(i)} \sim \pi_S(\cdot | \mathbf{x}, (u_{t'}^{(i)})_{t'=1}^{t-1})$ , conditioned on the target input image  $\mathbf{x}$  and previously sampled tokens  $(u_{t'}^{(i)})_{t'=1}^{t-1}$ . As a result, the Speaker’s goal attempts to find the best policy to maximize the expected reward:

$$J(\theta) = \mathbb{E}_{\mathbf{x} \sim \mathcal{U}(\mathbb{X})} [\mathbb{E}_{\pi_S(\cdot | \mathbf{x})} [R(\mathbf{x}, \hat{\mathbf{x}}, i)]] ,$$

where  $\mathbb{E}_{\mathbf{x} \sim \mathcal{U}(\mathbb{X})}$  considers the expectation for  $\mathbf{x}$  over the dataset  $\mathbb{X}$ , and  $\mathbb{E}_{\mathbf{x}, \pi_S}$  is over all possible outputs generated by  $\pi_S$ , in this case, all sequences of messages  $\mathbf{m}$ , for each  $\mathbf{x}$ . Also, note that the Speaker is agnostic to the current game round being played, meaning rounds are independent, where  $\pi_S$  will only optimize the reward obtained for the current round,  $i$ ,  $R(\mathbf{x}, \hat{\mathbf{x}}^{(i)}, i)$  where  $\hat{\mathbf{x}}^{(i)} = \hat{\mathbf{x}}_{\text{idk}} \vee \hat{\mathbf{x}}^{(i)} \in \{\mathbf{x}_1, \dots, \mathbf{x}_{|\mathbb{C}|}\}$ . For one-round games,  $R(\mathbf{x}, \hat{\mathbf{x}}, i) = R(\mathbf{x}, \hat{\mathbf{x}})$ .

By assessing a particular instance of an LG variant game, it is possible to define the expected reward, given a target image  $\mathbf{x}$  and game round  $i$ , as the value  $V^{\pi_S}(\mathbf{x}, \hat{\mathbf{x}}, i) = \mathbb{E}_{\mathbf{x}, \pi_S} [R(\mathbf{x}, \hat{\mathbf{x}}, i)]$ . Using the policy gradient theorem, we can derive the gradient for the policy  $\pi_S$  as:

$$\partial_{\theta} V^{\pi_S}(\mathbf{x}, \hat{\mathbf{x}}^{(i)}, i) = \mathbb{E}_{\mathbf{x}, \pi_S} \left[ \sum_{t=1}^T R(\mathbf{x}, \hat{\mathbf{x}}^{(i)}, i) \partial_{\theta} \log \pi_S \left( u_t^{(i)} | \mathbf{x}, (u_{t'}^{(i)})_{t'=1}^{t-1} \right) \right]. \quad (3)$$

As we can see in Equation 3, we set the discounted reward as  $R(\mathbf{x}, \hat{\mathbf{x}}, i)$ . This is true when the Speaker’s discount factor,  $\gamma_S$ , is set to 1, which is our case. Additionally, this is also a valid assumption since messages have a fixed length where only the final Speaker’s state (a message with  $T$  tokens) has an implication in the game, since it is when the message is sent to the Listener. As such, the Speaker only wants to maximize this final reward without considering delay through time. Moreover, to reduce the overall variance, we also subtract a baseline to  $R(\mathbf{x}, \hat{\mathbf{x}}, i)$ . In this case, the

Table 12: Hyperparameters exclusive to MRILG. The values of hyperparameters described as a set,  $\{\cdot\}$ , means we run experiments with each value in the set.

| hyperparameter | value                   |
|----------------|-------------------------|
| $N$            | 5                       |
| $\nu$          | $\{-0.5, -0.2, -0.05\}$ |

policy gradient becomes:

$$\partial_{\theta} V^{\pi_S}(\mathbf{x}, \hat{\mathbf{x}}^{(i)}, i) = \mathbb{E}_{\mathbf{x}, \pi_S} \left[ \sum_{t=1}^T \left( R(\mathbf{x}, \hat{\mathbf{x}}^{(i)}, i) - V_{t-1}^{\pi_S}(\mathbf{x}, \hat{\mathbf{x}}^{(i)}, i) \right) \partial_{\theta} \log \pi_S \left( u_t^{(i)} | \mathbf{x}, (u_{t'}^{(i)})_{t'=1}^{t-1} \right) \right], \quad (4)$$

where  $V_{t-1}^{\pi_S}(\mathbf{x}, \hat{\mathbf{x}}^{(i)}, i) = \mathbb{E}_{\mathbf{x}, \pi_S} [R(\mathbf{x}, \hat{\mathbf{x}}^{(i)}, i) | (u_{t'}^{(i)})_{t'=1}^{t-1}]$  contains the value currently conditioned on information gathered until timestep  $t - 1$ .

To approximate equation 4, the Speaker’s learning strategy will minimize the following two losses. First, the critic’s head  $v(\mathbf{z}_{t,\theta}^{(i)}; \theta)$  will adjust towards matching  $V_{t-1}^{\pi_S}(\mathbf{x}, \hat{\mathbf{x}}^{(i)}, i)$  by minimizing the critic loss  $L_C^{(i)}(\mathbf{x}, \hat{\mathbf{x}}^{(i)}; \theta)$ :

$$L_C^{(i)}(\theta) = \frac{1}{|\mathbb{X}|} \sum_{\mathbf{x} \in \mathbb{X}} \sum_{t=1}^T \left( R(\mathbf{x}, \hat{\mathbf{x}}^{(i)}, i) - v(\mathbf{z}_{t,\theta}^{(i)}; \theta) \right)^2.$$

Secondly, the actor’s policy loss  $L_A^{(i)}(\theta)$  targets minimizing the negative of the expected reward:

$$L_A^{(i)}(\theta) = -\frac{1}{|\mathbb{X}|} \sum_{\mathbf{x} \in \mathbb{X}} \sum_{t=1}^T \text{sg} \left( R(\mathbf{x}, \hat{\mathbf{x}}^{(i)}, i) - v(\mathbf{z}_{t,\theta}^{(i)}; \theta) \right) \log \left( \pi_S \left( u_t^{(i)} | \mathbf{z}_{t,\theta}^{(i)} \right) \right),$$

where  $\text{sg}$  is the *stop-gradient* function. Additionally, the Speaker’s actor head  $\pi_S(\cdot | \mathbf{z}_{t,\theta}^{(i)})$  estimates  $\pi_S(\cdot | \mathbf{x}, (u_{t'}^{(i)})_{t'=1}^t)$ , which is a valid approximation since the conditioned variable,  $\mathbf{z}_{t,\theta}^{(i)}$ , jointly encodes information about the target image  $\mathbf{x}$  and the tokens already present in the message  $(u_{t'}^{(i)})_{t'=1}^{t-1}$  due to its recurrent nature.

Furthermore, as Section 2.2.2 explains, the Speaker considers two additional loss terms to optimize together with equation 4. One such supplementary loss term is the KL divergence,  $L_{\text{KL}}^{(i)}(\theta)$ , which aims to minimize the relative entropy between the actor’s policy  $\pi_S$  and a target version of this policy  $\bar{\pi}_S$ , computed as an EMA,  $\bar{\theta} \leftarrow (1 - \eta)\theta + \eta\bar{\theta}$ , where  $\eta$  is a constant. As shown in previous studies (Schulman et al., 2017; Vieillard et al., 2020), using an additional KL loss term helps achieve better performance and, especially, stabilizes training which considerably helps in our case. We define  $L_{\text{KL}}^{(i)}(\theta)$  as:

$$L_{\text{KL}}^{(i)}(\theta) = \frac{1}{|\mathbb{X}|} \sum_{\mathbf{x} \in \mathbb{X}} \sum_{t=1}^T \mathbb{E}_{u \sim \pi_S(\cdot | \mathbf{z}_{t,\theta}^{(i)})} \left[ \pi_S(u | \mathbf{z}_{t,\theta}^{(i)}) \log \frac{\pi_S(u | \mathbf{z}_{t,\theta}^{(i)})}{\bar{\pi}_S(u | \mathbf{z}_{t,\bar{\theta}}^{(i)})} \right].$$

The other additional loss term is an entropy loss term  $L_{\mathcal{H}}(\theta)$ , where the objective passes to increase the actor’s policy entropy to incentivize the exploration of new actions (tokens to create the message). Given  $\pi_S$ , the entropy loss term minimizes the following negative sampled version of the entropy:

$$L_{\mathcal{H}}^{(i)}(\theta) = \frac{1}{|\mathbb{X}|} \sum_{\mathbf{x} \in \mathbb{X}} \sum_{t=1}^T \mathbb{E}_{u \sim \pi_S(\cdot | \mathbf{z}_{t,\theta}^{(i)})} \left[ \pi_S(u | \mathbf{z}_{t,\theta}^{(i)}) \log \pi_S(u | \mathbf{z}_{t,\theta}^{(i)}) \right].$$

### E.1.2 LISTENER

Looking at the learning strategy for the Listener agent, we first emphasize that, in the case of the MRILG, future rounds depend on past ones. Therefore, it is crucial to model the Listener’s reasoning as a sequential decision problem involving all game rounds to ensure information can flow between them, giving the Listener more complete information and helping it decide the best course of action. In this setting, the Listener’s actor policy  $\pi_L$  depends on all messages received until the current round,  $i$ ,  $\mathbf{M}^{(i)} = (\mathbf{m}^{(i')})_{i'=1}^i$  and the candidates set  $\mathbb{C} \subset \mathbb{X}$ . Note also that the Listener intrinsically knows that all its previous actions were the *idk* action since this is the only way for the Listener to play another game round. As a result, the Listener’s goal passes to maximize the expected reward given all rounds of the game:

$$\begin{aligned} J(\phi) &= \mathbb{E}_{\mathbf{x} \sim \mathcal{U}(\mathbb{X}), \mathbb{C} \sim \mathcal{U}(\mathbb{X}), \mathbf{M}^{(N-1)} \sim \pi_L} \left[ \mathbb{E}_{\mathbb{C}, \mathbf{M}^{(N-1)}, \pi_L} [G_0(\mathbf{x}, \hat{\mathbf{x}})] \right] \\ &= \mathbb{E}_{\mathbf{x} \sim \mathcal{U}(\mathbb{X}), \mathbb{C} \sim \mathcal{U}(\mathbb{X}), \mathbf{M}^{(N-1)} \sim \pi_S} \left[ \mathbb{E}_{\mathbb{C}, \mathbf{M}^{(N-1)}, \pi_L} \left[ \sum_{i=0}^{N-1} \gamma^i R(\mathbf{x}, \hat{\mathbf{x}}, i) \right] \right], \end{aligned} \quad (5)$$

where the expectation  $\mathbb{E}_{\mathbf{x} \sim \mathcal{U}(\mathbb{X}), \mathbb{C} \sim \mathcal{U}(\mathbb{X}), \mathbf{M}^{(N-1)} \sim \pi_S(\cdot|\mathbf{x})}$  considers the space containing all possible combinations of the target image  $\mathbf{x}$  sampled from a discrete uniform distribution over the training dataset  $\mathcal{U}(\mathbb{X})$ , set of candidates  $\mathbb{C}$  also sampled independently from the same distribution  $\mathcal{U}(\mathbb{X})$ , and sequences of messages  $\mathbf{M}^{(N-1)}$  each generated by the Speaker’s policy  $\pi_S$ . Note, that  $\mathbb{C} \sim \mathcal{U}(\mathbb{X})$  is an abuse of notation (used for readability), where in reality, we have  $\mathbb{C}'_1, \dots, \mathbb{C}'_{|\mathbb{C}|-1} \stackrel{\text{i.i.d.}}{\sim} \mathcal{U}(\mathbb{X})$  and  $\mathbb{C} = \{\mathbf{x}\} \cup \mathbb{C}'$ . Similarly,  $\mathbf{M}^{(N-1)} \sim \pi_S$  is a simplified notation for  $\mathbf{m}'^{(i)} = \text{noise}(\mathbf{m}^{(i)}(\mathbf{x}; \theta)) = (n_t(u_t^{(i)}))_{t=1}^T$ , where  $\mathbf{m}'^{(i)} \in \mathbf{M}^{(N-1)}$ ,  $u_t^{(i)} \sim \pi_S(\cdot|\mathbf{x}, (u_{t'}^{(i)})_{t'=1}^{t-1})$ , and  $n_t$  is defined in equation 1. The second expectation  $\mathbb{E}_{\mathbb{C}, \mathbf{M}^{(N-1)}, \pi_L}$  of equation 5 is over all possible actions for the listener’s policy when fixing the target image  $\mathbf{x}$ , candidates  $\mathbb{C}$  and message sequence  $\mathbf{M}^{(N-1)}$ . Moreover, focusing on a particular occurrence of an LG variant, we define  $I \in \{0, \dots, N-1\}$  as the number of effective rounds played, e.g., if the Listener plays the *idk* action in the first two rounds and then makes a final prediction (choosing a candidate), then  $I = 2$ . By fixing  $I$ ,  $\mathbf{M}^{(I)}$ , and  $\mathbb{C}$ , it is possible to define the value  $V^{\pi_L}(\mathbf{x}, \mathbf{M}^{(I)}, \mathbb{C})$  as:

$$V^{\pi_L}(\mathbf{x}, \mathbb{C}, \mathbf{M}^{(I)}) = \mathbb{E}_{\mathbb{C}, \mathbf{M}^{(I)}, \pi_L} \left[ \sum_{i=0}^I \gamma^i R(\mathbf{x}, \hat{\mathbf{x}}, i) \right].$$

Retaking the policy gradient theorem, we derive:

$$\begin{aligned} \partial_\theta V^{\pi_L}(\mathbf{x}, \hat{\mathbf{x}}, \mathbb{C}, \mathbf{M}^{(I)}) &= \\ &\mathbb{E}_{\pi_L} \left[ \sum_{i=0}^{I-1} \left( G(\mathbf{x}, \hat{\mathbf{x}}_{\text{idk}}, i, I) - V^{\pi_L}(\mathbf{x}, \mathbb{C}, \mathbf{M}^{(i-1)}) \right) \partial_\theta \log \left( \pi_L(\hat{\mathbf{x}}_{\text{idk}} | \mathbf{M}^{(i)}, \mathbb{C}) \right) \right. \\ &\quad \left. + \left( G(\mathbf{x}, \hat{\mathbf{x}}, I, I) - V^{\pi_L}(\mathbf{x}, \mathbb{C}, \mathbf{M}^{(I-1)}) \right) \partial_\theta \log \left( \pi_L(\hat{\mathbf{x}} | \mathbf{M}^{(I)}, \mathbb{C}) \right) \right], \end{aligned}$$

where  $V^{\pi_L}(\mathbf{x}, \mathbb{C}, \mathbf{M}^{(i-1)}) = \mathbb{E}_{\pi_L} [R(\mathbf{x}, \hat{\mathbf{x}}_{\text{idk}}, i) | \mathbf{M}^{(i-1)}, \mathbb{C}]$  encodes the value conditioned on all previous information until the previous round  $i-1$ . The action  $\hat{\mathbf{x}}_{\text{idk}}$  corresponds to choosing the *idk* action, which happens for every round  $i$ , where  $i < I$ . Additionally, Equation 2  $G$ .

Similarly to the Speaker, the main objective of the Listener’s training encompasses minimizing a critic (value) loss  $L_C(\phi)$  and a actor’s policy loss term  $L_A(\phi)$ . Regarding the value loss term  $L_C(\phi)$ , the function takes the form:

$$L_C(\phi) = \frac{1}{I} \sum_{i=0}^I \left( G(\mathbf{x}, \hat{\mathbf{x}}, i, I) - v(\mathbf{s}^{(i)}; \phi) \right)^2,$$

where the Listener’s critic head  $v(\mathbf{s}^{(i)}; \phi)$  fits  $V^{\pi_L}(\mathbf{x}, \mathbb{C}, \mathbf{M}^{(i-1)})$ . Additionally, to derive the original policy  $\pi_L(\cdot | \mathbf{M}^{(i)}, \mathbb{C})$ , the Listener’s actor head  $\pi_L(\cdot | \mathbf{s}^{(i)}, s_{\text{idk}}^{(i)})$  targets the minimization of

the negative of the expected rewards:

$$L_A(\phi) = -\frac{1}{I} \left[ \sum_{i=0}^{I-1} \text{sg} \left( G(\mathbf{x}, \hat{\mathbf{x}}_{\text{idk}}, i, I) - v(\mathbf{s}^{(i)}; \phi) \right) \log \pi_L \left( \hat{\mathbf{x}}_{\text{idk}} | \mathbf{s}^{(i)}, s_{\text{idk}}^{(i)} \right) \right. \\ \left. + \text{sg} \left( G(\mathbf{x}, \hat{\mathbf{x}}, I, I) - v(\mathbf{s}^{(I)}; \phi) \right) \log \pi_L \left( \hat{\mathbf{x}} | \mathbf{s}^{(I)}, s_{\text{idk}}^{(I)} \right) \right],$$

where  $\mathbf{s}^{(i)}$  encodes information from all previous messages and the candidates set, and  $s_{\text{idk}}^{(i)}$  considers information about the *idk* action that also depends on  $\mathbf{s}^{(i)}$ . At last, we also add an entropy loss term  $L_{\mathcal{H}}^{(i)}(\phi)$  to the Listener’s loss to prevent early stagnation for specific actions:

$$L_{\mathcal{H}}^{(i)}(\phi) = \frac{1}{I} \left[ \sum_{i=0}^{I-1} \mathbb{E}_{\hat{\mathbf{x}}_{\text{idk}} \sim \pi_L(\cdot | \mathbf{s}^{(i)}, s_{\text{idk}}^{(i)})} \left[ \pi_L \left( \hat{\mathbf{x}}_{\text{idk}} | \mathbf{s}^{(i)}, s_{\text{idk}}^{(i)} \right) \log \pi_L \left( \hat{\mathbf{x}}_{\text{idk}} | \mathbf{s}^{(i)}, s_{\text{idk}}^{(i)} \right) \right] \right. \\ \left. + \mathbb{E}_{\hat{\mathbf{x}} \sim \pi_L(\cdot | \mathbf{s}^{(I)}, s_{\text{idk}}^{(I)})} \left[ \pi_L \left( \hat{\mathbf{x}} | \mathbf{s}^{(I)}, s_{\text{idk}}^{(I)} \right) \log \pi_L \left( \hat{\mathbf{x}} | \mathbf{s}^{(I)}, s_{\text{idk}}^{(I)} \right) \right] \right].$$

## E.2 DATASETS

The datasets used to evaluate the proposed games are the ImageNet (Russakovsky et al., 2015) and CelebA (Liu et al., 2015). We use the datasets provided by Chaabouni et al. (2022), where the authors preprocess the data, as we will explain next. The ImageNet dataset contains mainly RGB images of objects and animals clustered over 1000 labels. The training of the LG and ETL experiments uses 99% of the original training data of ImageNet and the official validation set as the test set. The CelebA dataset contains RGB images of celebrity faces denoting 10177 different identities. This dataset also describes binary attributes for each image, like smiling, hair color, and glasses. Additionally, a new dataset split is performed to ensure there is overlapping for all identities between all sets (train, validation, and test), see Chaabouni et al. (2022).

Finally, images from both datasets are down-sampled using bicubic sampling, forcing the shorted side to have 256 pixels, and then a center crop of 224x224 pixels is applied. The channel axis also suffers normalization using mean and SD obtained from the ImageNet train set (He et al., 2016). Afterward, a ResNet architecture pre-trained with BYOL (Grill et al., 2020) on ImageNet outputs the representation used in all experiments, see Appendix D.1.

## E.3 SCHEDULING NOISE

The approach on how to introduce noise to the NLG and MRILG games during the training phase highly influences the learning of both agents, which ultimately can impact overall performance and sample efficiency. As such, we present the Figure 7 and compare different ways to introduce and schedule the noise threshold during training. From Figure 7a, in the first trial (1), the noise value is fixed at its final value (0.5) during the entire training procedure. For the second one (2), a scheduler linearly scales the noise from 0 to 0.5 during the first 40% of the training steps. Analyzing both experiments, we observe that by gradually scheduling the noise, instead of fixing it at the pretended end value, the mean reward leaves the failing zone considerably earlier, meaning the agents have an easier time starting coordinating on a shared communication protocol. Having the noise increase gradually allows for the pair of agents to first focus on creating a common language and, only after, slowly adjust to the noise in the message. Note that introducing noise makes the environment highly stochastic since the noise introduced is random. Additionally, the Listener is the only one capable of perceiving this modification, which makes the coordination between the pair more challenging. Figure 7b also corroborates our analysis, where in (1), the Speaker’s entropy only starts decreasing after 120k steps, as opposed to (2), where the same happens just after 50k steps. As such, a communication protocol starts to emerge much sooner in (2), where the Speaker begins conveying more stable and regular messages.

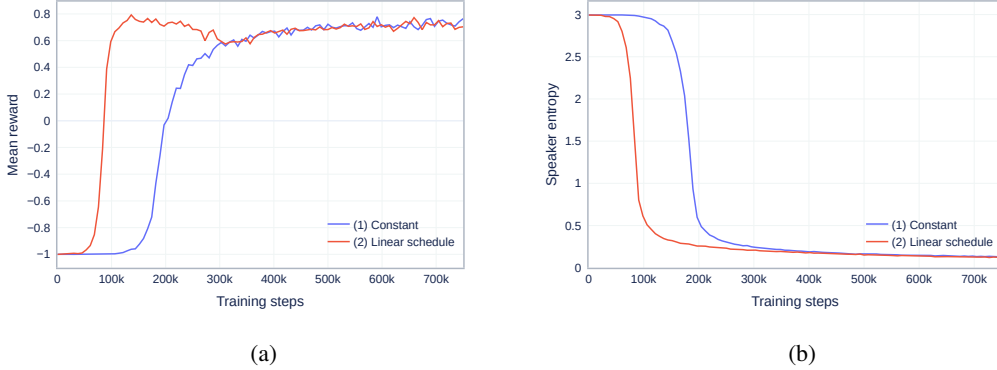

Figure 7: Mean reward (a) and the mean value for the Speaker’s policy entropy (b) on the ImageNet dataset of different implementations of MRILG, with  $\nu = -0.5$ , and  $|\mathbb{C}| = 1024$ . The MRILG implementations differ on how to schedule the noise  $\lambda$  value during training: (1)  $\lambda$  remains constant at the end value 0.5; (2)  $\lambda$  linearly scales from 0 to 0.5 during the first 300 k steps, staying at this value afterward.

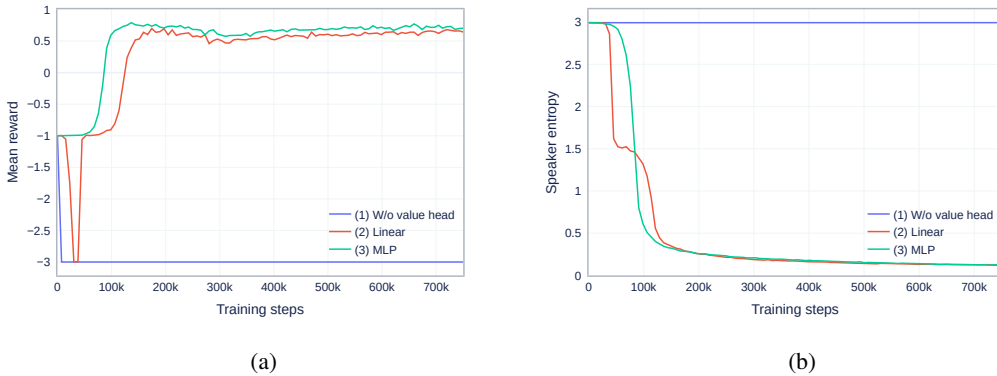

Figure 8: Mean reward (a) and the mean value for the Speaker’s policy entropy (b) on the ImageNet dataset of different implementations of MRILG, with  $\lambda = 0.5$ ,  $\nu = -0.5$ , and  $|\mathbb{C}| = 1024$ . The MRILG implementations differ in the architecture used for the value head  $v(\cdot; \phi)$ : (1)  $v(\cdot; \phi)$  is not implemented; (2)  $v(\cdot; \phi)$  is a single linear layer; (3)  $v(\cdot; \phi)$  is an MLP (w/ 2 hidden layers).

#### E.4 COMPARE DIFFERENT LISTENER HEAD CONFIGURATIONS

At the end of the Section 2.2.2, we argued that the Listener must have a critic head complementary to its actor’s head. The Listener requires this design choice to have sufficient conditions to learn and understand how to evaluate actions to further adjust its policy on mapping messages to the correct candidates (correct actions) accordingly. Only when the Listener has such capabilities can the pair of agents coordinate on developing a communication protocol efficiently.

We support such a claim in Figure 8, where Figure 8a shows the game’s mean reward obtained by the agents during training, and the Speaker’s entropy progress during training appears in Figure 8b. From Figure 8a, we observe the agents cannot learn how to communicate when we implement the Listener without a critic head (1), where the reward is the lowest possible until the end of the training phase. In this case, we also see that the Seaker’s entropy remains high and constant throughout learning (Figure 8b), indicating that the pair of agents never agree on a communication protocol.

When the Listener architecture includes a linear layer as the critic head (2), there is a considerable performance boost in the final reward obtained by both agents. After an unstable initial training period (first 50k steps), where the Listener tries to exploit the idk action unsuccessfully, the agents gradually learn how to coordinate. Consequently, a common language emerges starting from 100k

steps. Validating this result, we observe that the speaker entropy starts decreasing around the 35k step mark. As such, since early training, the Speaker starts creating more systematic messages, further facilitating the Listener’s job of mapping messages to the positive candidates.

Finally, we arrive at our default implementation by substituting the linear layer with an MLP for the critic head (3). This additional modification improves the sample efficiency compared to the linear version, where the established language emerges succeeding 80k steps (Figure 8a). Furthermore, as the training routine stabilizes (300k step onward), we observe that the MLP version plateaus to a slightly higher mean reward than the linear version. Factoring in the Speaker’s entropy, we note a smooth decrease, after the 55k step mark, to the same lower bound as the linear version, around 0.12. Although the entropy for the MLP version leaves a high bound later, it achieves a lower value earlier than the linear version, which is the key to have better sample efficiency.

## F EASE & TRANSFER LEARNING

Following Chaabouni et al. (2022), we also utilize secondary tasks to evaluate the generality and applicability of the languages learned in each LG variant. This evaluation procedure is called Ease & Transfer Learning (ETL). The primary purpose of ETL is to evaluate if a preceding communication protocol, which was grounded in a particular task, can be used by new agents to solve new tasks. If this proposition holds, we get solid and empirical evidence about the generality of the emergent language since it can encode high-level descriptive information to solve different types of tasks related to the original environment.

ETL comprises four tasks: *Discrimination*, *Classification*, *Attribute*, and *Reconstruction*. We use the first two tasks to evaluate instances of games played with the ImageNet dataset and all four tasks when using the CelebA dataset. Due to the lack of description and reproducibility in Chaabouni et al. (2022), we thoroughly report the objective of each task accompanied by the training regime and hyper-parameters adopted.

We define new Listener agents to play the new tasks with a previously trained Speaker from one of the original LG games. Additionally, we freeze the Speaker weights, meaning the communication protocol remains fixed throughout training and evaluation of the ETL task. As such, we generate a new discrete dataset that depends on the Speaker (converting each image into a message). On this account, the only learning agent is the Listener. The Listener architecture has a common module used to process the received message that does not depend on the ETL task. This module is equal to the one implemented in the Listener architecture used in the LG, see Section 2.2.1. The difference between architectures occurs in the Listener’s head module, as we will describe when introducing each task.

Similar to the tests employed for the LG games, we add a new dimension for the ETL tasks where we perturb the communication channel by adding noise. Accordingly, by varying this new dimension, we can analyze how it affects the generalization capabilities of the communication protocols. We also force all ETL tasks to have only one round for fair comparisons. We will now describe each ETL task in detail, and afterward, the evaluation performed.

### F.1 DISCRIMINATION TASK

This task is similar to the original LG task, where the difference is that we add noise to the candidates and the Speaker’s input. The noise follows a Gaussian distribution with mean  $\mu$  and a standard deviation  $\sigma$ , see Table 14. Since we now have a fixed dataset, we regard this task as a supervised problem where we design the Listener to have a similar architecture to the one used in the original LG (SS). As such, we define a distance loss to train the Listener to recognize similarities between messages and the correct candidate and, simultaneously, dissimilarities to opposing ones. To create a more challenging task, we set the size of the candidates’ set,  $|\mathcal{C}|$ , to 4096.

#### F.1.1 LISTENER’S HEAD ARCHITECTURE

We plug the head defined for the LG (SS) (Appendix D.2.2), where a similarity function computes similarities between the message and each candidate. Then, a softmax function converts similarities into a categorical distribution to train using InfoNCE loss (Oord et al., 2018).



Table 13: Hyperparameters modified (from Table 16) for the Discrimination task.

| hyperparameter | value                     |
|----------------|---------------------------|
| $\mu$          | 0                         |
| $\sigma$       | 0.5                       |
| $ \mathbb{C} $ | 4096                      |
| batch size     | 4096 ( $=  \mathbb{C} $ ) |

Table 14: Hyperparameters modified (from Table 16) for the Classification task.

| hyperparameter                             | value |
|--------------------------------------------|-------|
| training steps (for ImageNet dataset only) | 30 k  |

### F.1.2 HYPERPARAMETERS

The hyperparameters adjusted for the Discrimination task appear in Table 13.

## F.2 CLASSIFICATION TASK

With the classification task, we aim to evaluate whether the emerging language has any valuable information to identify the category of an image. In this task, the Speaker receives an image and encodes a message to the Listener. Afterward, the Listener tries to determine the class of the image while receiving only the message sent by the Speaker as input. For the ImageNet dataset, we use the label of each image as the target and the identity for the CelebA dataset.

### F.2.1 LISTENER’S HEAD ARCHITECTURE

Since the objective of the Classification task is to identify the class of the image received by the Speaker, the Listener’s head architecture consists of only one MLP where the final layer has the same size as the number of classes (1000 and 10177, for the ImageNet and CelebA datasets, respectively) and is then used for prediction after applying softmax. The MLP mentioned above also has one hidden layer of size 256 and uses ReLU as the activation function.

### F.2.2 HYPERPARAMETERS

Table 14 exposes the hyperparameters modified explicitly for the Classification task.

## F.3 ATTRIBUTE TASK

This task is very similar to the classification task, where instead of predicting the image class, the Listener tries to predict secondary binary information related to facial attributes, such as gender, hair color, and age.

### F.3.1 LISTENER’S HEAD ARCHITECTURE

The Listener architecture is similar to the one described for the classification task, Appendix F.2.1. In this case, we have an independent model to classify each attribute, where the loss adopted is the binary cross-entropy loss.

## F.4 RECONSTRUCTION TASK

The final ETL task is the Reconstruction task, where the primary purpose is reconstructing the original image. The Listener’s head promotes a convolutional decoder to reconstruct the original input image (Speaker’s input) by taking into account only the discrete message sent by the Speaker. See Appendix F.4.1 for a complete description of the Listener’s head architecture.

Table 15: Hyperparameters modified (from Table 16) for the Reconstruction task.

| hyperparameter                    | value                     |
|-----------------------------------|---------------------------|
| $G_{\max}$                        | 500                       |
| Listener’s optimizer              | adam w/ weight decay reg. |
| Listener’s optimizer lr           | $3 \times 10^{-4}$        |
| Listener’s optimizer b1           | 0.9                       |
| Listener’s optimizer b2           | 0.9                       |
| Listener’s optimizer weight decay | 0.01                      |

Table 16: Default hyperparameters used in all ETL tasks. Note that each ETL task can change some parameter values, as specified in Appendices F.1, F.2 and F.4

| hyperparameter          | value              |
|-------------------------|--------------------|
| training steps          | 10 k               |
| batch size              | 128                |
| $ \mathcal{W} $         | 20                 |
| $T$                     | 10                 |
| Listener’s optimizer    | adam               |
| Listener’s optimizer lr | $1 \times 10^{-3}$ |

#### F.4.1 LISTENER’S HEAD ARCHITECTURE

The Listener’s head architecture encapsulates a decoder to reconstruct the original image. Since the hidden message features  $z_{T,\phi}$  are the input of this module and have only one dimension, the first step addresses the redimension of  $z_{T,\phi}$  into a 3D shape. As such, a single linear layer of size 2048 upsamples  $z_{T,\phi}$ , where the resulting dimension is (4, 4, 128) (with layout (height, width, channel)) after reshaping, as  $128 \times 4 \times 4 = 2048$ . Afterward, a decoding procedure aims to upsample the features’ first two dimensions. The procedure occurs four times sequentially, and at each step, we upsample the dimensions of the current features by doubling the width and height, using nearest neighbor interpolation. Next, the upsampled features are given to a convolution layer followed by a ReLU to reduce the number of channels as part of the reconstruction process. The number of output channels is 64, 32, 16, 16 for each convolution, respectively. Finally, a concluding convolution layer, followed by tanh, outputs the decoded image with dimensions (64, 64, 3). With tanh as the final activation, the reconstructed image is the standardized version of the original one after normalization using the ImageNet coefficients (He et al., 2016). Furthermore, the parameters for all convolutions are equal: kernel size of (3 × 3), padding same, stride 1, and without bias. Additionally, we use the MSE loss to train the Listener.

Finally, we employ the same optimizer parameters as the original work (Chaabouni et al., 2022), where gradients are first clipped by their global norm when it is above a maximum threshold  $G_{\max}$  (Pascanu et al., 2013). Then, adam with weight decay regularization (Loshchilov & Hutter, 2017) computes the update rule. For more information on the hyper-parameters used, see Appendix F.4.2.

#### F.4.2 HYPERPARAMETERS

Please refer to Table 15 to consult the modified hyperparameters for the Reconstruction task.

### F.5 COMMON HYPERPARAMETERS

Table 16 describes the hyperparameters commonly used by all ETL tasks.

### F.6 EVALUATION

In this sub-section, we present all results obtained by evaluating all ETL tasks regarding each LG variant trained. Similarly to the primary evaluation, Section 3, we describe the results incrementally,

Table 17: Test accuracy, with SD, of every ETL task trained using, the ImageNet dataset and over 10 seeds. During the LG training (before ETL), we fixed  $|\mathbb{C}|$  to 1024.

| Game    | $ \mathbb{C} $ | ETL tasks      |                |
|---------|----------------|----------------|----------------|
|         |                | Discrimination | Classification |
| LG (SS) | 1024           | 0.58<br>(0.05) | 0.14<br>(0.01) |
| LG (RL) | 1024           | 0.88<br>(0.01) | 0.14<br>(0.01) |

Table 18: Test accuracy, with SD, of every ETL task trained, using the CelebA dataset and over 10 seeds. During the LG training (before ETL), we fixed  $|\mathbb{C}|$  to 1024.

| Game    | $ \mathbb{C} $ | ETL tasks      |                |                |                |
|---------|----------------|----------------|----------------|----------------|----------------|
|         |                | Discrimination | Classification | Attribute      | Reconstruction |
| LG (SS) | 1024           | 0.44<br>(0.05) | 0.01<br>(0.00) | 0.86<br>(0.00) | 5814<br>(74)   |
| LG (RL) | 1024           | 0.62<br>(0.08) | 0.01<br>(0.00) | 0.85<br>(0.00) | 5671<br>(192)  |

where we start by comparing both implementations (SS and RL) for the original LG. Afterward, we introduce noise, adding NLG and MRILG to the comparison. Besides this analysis, we also explore the impact of different values for the *idk* reward for the MRILG. Additionally, we compare the influence of the candidate set size in all LG variants. Regarding the metrics adopted, we report accuracy for all tasks except for the Reconstruction task, where we report the obtained final loss.

#### F.6.1 SS & RL IMPLEMENTATIONS FOR LG

We start the ETL evaluation by showcasing and comparing the performance of both prototypes of the LG (SS and RL) when training without noise. We report the test performance for all applicable ETL tasks for the ImageNet and CelebA datasets in Tables 17 and 18, respectively. As we will see next, our newly proposed variant, LG (RL), reports better results than LG (SS).

Looking at the discrimination task, we continue to observe the same behavior encountered in the LG evaluation, Section 3, where the RL version is superior to SS. From this new perspective, we obtain further evidence that the communication protocol from the RL variant is more general than the SS counterpart. In this case, the messages from the RL version are more appropriate to describe the noisy image, which facilitates the selection process by the new Listener agent. As such, the communication protocol from LG (RL) is more capable of dealing with other noise sources, such as detecting noise in the Speaker’s input image.

Regarding the classification task, we see deficient performance for both datasets, with around 0.1 and 0 test accuracy for ImageNet and CelebA, respectively. Not only that, but we also observe the same results for all LG variants testing with or without noise. In Appendix F.6.5, we propose a simple explanation for these results that emerge from the messages’ content and structure.

Taking a closer look at the results for the CelebA dataset, we observe similar and considerably high results (around 0.85) for the attribute task, which does not depend on the LG version, SS or RL. We can then assess that there is a specific batch of images where the Listener agent cannot decode any relevant information from the message to accurately classify the attribute.

For the final task, Reconstruction, we showcase the loss function obtained in the test set. We observe that LG (RL) obtains lower loss than LG (SS). To complement this analysis, Figure 9 shows the reconstruction of several images for the LG (SS) and LG (RL) variants. Both versions can reconstruct some particularities of the original image such as sunglasses, hat, hair color, and gender. On the other hand, information about orientation, age, or skin tone are not encoded in the messages. Additionally we can clearly observe different facial layouts and different hair color, reconstructed by LG (SS) and LG (RL), for the same image.

### F.6.2 INTRODUCING NOISE

To evaluate the robustness of the proposed LG variants to message perturbations, we add a new train/test regime to ETL where the communication channel disturbs messages sent by the Speaker by adding random noise, similar to NLG and MRILG. To have an insightful analysis, we propose comparing LG (RL), NLG, and MRILG in the case of train/test regimes without and with noise. We disregard LG (SS) since LG (RL) achieved better results, see Appendix F.6.1. Additionally, to have a contained analysis, we fixed the noise level to 0.5, the candidate set size to 1024, and the *idk* reward at  $-0.2$ . The exhaustive version of these results appears at Tables 31 to 38.

The results for the ImageNet dataset appear in Tables 19 and 21 for the train/test regime without and with noise, respectively. Regarding the Discrimination task in the deterministic procedure (without noise), the accuracy obtained for the noisy games, NLG and MRILG, are slightly lower than in the LG (RL), around 0.03 and 0.06, respectively. Despite this minor decline, we continue to obtain evidence that the noisy LG variants generate robust communication protocols of similar efficiency to those induced by LG (RL). Another interesting observation is that the accuracy obtained in NLG is slightly higher than MRILG's. In the latter case, the available information suggests that the retained communication protocol by the Speaker had more redundant information in each message which is not valuable for a new one-round task. When introducing noise in the communication channel, we observe a performance increase, around 0.05, for NLG and MRILG against LG (RL). Recall that the discrimination task adds continuous noise to the Speaker's input and candidates. Having noisy inputs creates a different type of uncertainty that the communication protocol is not optimized for. Even having robust agents to message noise practically does not impact the creation of more descriptive messages when a significant part of the noise comes from another source, in this case, combined with the input.

We perform a similar comparison for the CelebA dataset deployed in Tables 20 and 22. Focusing on the Discrimination task and the deterministic regime, LG (RL), NLG, and MRILG have statistically equal accuracy values with mean 0.62, 0.60, and 0.58, respectively. CelebA contains highly identical samples since it only includes images of persons, whereas ImageNet aggregates images from 1000 object categories. In this case, the performance obtained was similar between all variants. When training and testing with noise, we observe a considerable drop in accuracy, around 0.35, for all variants. Similarly to what we discovered for the ImageNet dataset, the noise introduced to the inputs turns the discriminative task more challenging than the original game. Inspecting the results, NLG and MRILG obtain similar accuracy (0.31 and 0.30, respectively) against an accuracy for LG (RL) around 0.26. As such, we get an indication that the NLG and MRILG's protocol are slightly more robust to noise in the communication channel combined with noise in the input image.

Regarding the Attribute task, all values vary between 0.84 and 0.86. As such, the performances for every LG variant and train/test regime are highly identical. We hypothesize that there is a considerable collection of samples where the identification of each attribute is accessible and effortlessly contemplated in the communication protocols. For the other minority of samples, the communication protocols cannot encode information about the attributes. For this reason, we observe a sharp rupture in accuracy for all methods.

Finally, we compare the results obtained in the Reconstruction task. The losses for all LG variants are statistically equal for the train/test regimes without and with noise. No LG variant demonstrated superior performance for this challenging task, which is obviously expected since the reconstructed images originate from discrete tokens (message content), making extracting unique information from each image extremely difficult. Additionally, in Figures 9, 10 and 12, we show some reconstructed images for the compared LG variants (LG (RL), NLG, and MRILG, respectively). The level of reconstruction detail is similar across variants, where we can see all variants encoding hat, sunglasses, hair color, and ignoring attributes not relevant to the original discrimination task, such as skin tone and face orientation.

### F.6.3 VARYING IDK REWARD

From the original evaluation Section 3.2.2, substantial evidence supported that the *idk* reward considerably impacts the agent's overall performance in the MRILG. Thus, we continue this evaluation in the context of transfer learning, ETL, by comparing instances of MRILG with a fixed noise (0.5) and batch size (1024), where we only vary the *idk* reward. The evaluation description for the ImageNet

Table 19: Test accuracy, with SD, of every ETL task trained, using the ImageNet dataset and over 10 seeds. We do not apply noise during ETL’s train and test phase. During the LG training (before ETL), we fixed  $|\mathbb{C}|$  to 1024,  $\lambda$  to 0.5, and  $\nu$  to  $-0.2$ .

| Game    | $\lambda$ | $\nu$  | $ \mathbb{C} $ | ETL tasks      |                |
|---------|-----------|--------|----------------|----------------|----------------|
|         |           |        |                | Discrimination | Classification |
| LG (RL) | -         | -      | 1024           | 0.88<br>(0.01) | 0.14<br>(0.01) |
| NLG     | 0.5       | -      | 1024           | 0.85<br>(0.03) | 0.14<br>(0.02) |
| MRILG   | 0.5       | $-0.2$ | 1024           | 0.86<br>(0.03) | 0.13<br>(0.01) |

Table 20: Test accuracy, with SD, of every ETL task trained, using the CelebA dataset and over 10 seeds. During the LG training (before ETL), we fixed  $|\mathbb{C}|$  to 1024. We do not apply noise during ETL’s train and test phase. During the LG training (before ETL), we fixed  $|\mathbb{C}|$  to 1024,  $\lambda$  to 0.5, and  $\nu$  to  $-0.2$ .

| Game    | $\lambda$ | $\nu$  | $ \mathbb{C} $ | ETL tasks      |                |                |                |
|---------|-----------|--------|----------------|----------------|----------------|----------------|----------------|
|         |           |        |                | Discrimination | Classification | Attribute      | Reconstruction |
| LG (RL) | -         | -      | 1024           | 0.62<br>(0.08) | 0.01<br>(0.00) | 0.85<br>(0.00) | 5671<br>(192)  |
| NLG     | 0.5       | -      | 1024           | 0.60<br>(0.10) | 0.00<br>(0.00) | 0.85<br>(0.00) | 5659<br>(129)  |
| MRILG   | 0.5       | $-0.2$ | 1024           | 0.58<br>(0.12) | 0.00<br>(0.00) | 0.85<br>(0.00) | 5644<br>(121)  |

dataset appears in Tables 23 and 25 for the train/test regime without and with noise, respectively. Similarly, and according to the same respective noise schemes, Tables 24 and 26 present the results for the CelebA dataset. The extensive report divided by the noise level and train/test regime appears in Tables 31 to 38.

Starting with the ImageNet dataset, we focus on the Discrimination task. In Table 23, we place the deterministic train/test regime results and observe that the choice for the *idk* impacts the overall performance moderately. The highest obtained test accuracy for the three reward levels ( $-0.5$ ,  $-0.2$ , and  $-0.05$ ) is around 0.86 when *idk* is fixed at  $-0.2$ , opposing a slight decrease to 0.82 when  $\nu = -0.5$  and a large decrease to 0.65 for the remain *idk* level ( $-0.05$ ). We can describe this conduct as, when having an *idk* reward close to 0 can direct the Listener toward developing a communication protocol containing more redundant information (playing more rounds than necessary), having a higher likelihood of overfitting the training dataset.

When adding noise to the ETL task, we obtain similar results, where the *idk* reward of  $-0.05$  outputs lower results than the other two levels. In this train/test regime, the new Listener agent has more difficulty reasoning and combining the two input noisy sources (message and candidates), decreasing the test accuracy by almost 0.50 (roughly 0.8 to 0.4). Based on the difference in performance for both train/test regimes, we can infer that having access to the complete message generated by the Speaker (all information) is crucial to discriminate noisy inputs.

Addressing now the CelebA dataset, we observe a similar result for the Discrimination task in the deterministic train/test regime, where the *idk* rewards of  $-0.5$  and  $-0.2$ ) obtains the highest test accuracies of 0.59 and 0.58, against 0.28 got when setting the *idk* reward at  $-0.05$ . Thus, we can employ the same reasoning as described above for the ImageNet dataset, and since CelebA is a more challenging dataset (Appendix F.6.2) the differences are even more prominent. Similarly, having an *idk* away from 0 balances the creation of a communication protocol that leverages multi-round information in its development and, at the same time, is not redundant by only continuing playing when new information can be attained. Regarding the Attribute task, the results are the same when setting the *idk* reward to  $-0.5$  or  $-0.2$ . For the value  $-0.05$ , the accuracy drops slightly to 0.83, which can be, again, a consequence of the presence of more redundant information in the communication protocol (see text above). Moving to the final task, Reconstruction, we point to the

Table 21: Test accuracy, with SD, of every ETL task trained, using the ImageNet dataset and over 10 seeds. We fix the noise during ETL’s train and test phase at 0.5. During the LG training (before ETL), we fixed  $|\mathbb{C}|$  to 1024,  $\lambda$  to 0.5, and  $\nu$  to  $-0.2$ .

| Game    | $\lambda$ | $\nu$  | $ \mathbb{C} $ | ETL tasks      |                |
|---------|-----------|--------|----------------|----------------|----------------|
|         |           |        |                | Discrimination | Classification |
| LG (RL) | -         | -      | 1024           | 0.36<br>(0.02) | 0.07<br>(0.00) |
| NLG     | 0.5       | -      | 1024           | 0.41<br>(0.02) | 0.08<br>(0.01) |
| MRILG   | 0.5       | $-0.2$ | 1024           | 0.41<br>(0.01) | 0.07<br>(0.01) |

Table 22: Test accuracy, with SD, of every ETL task trained, using the CelebA dataset and over 10 seeds. We fix the noise during ETL’s train and test phase at 0.5. During the LG training (before ETL), we fixed  $|\mathbb{C}|$  to 1024,  $\lambda$  to 0.5, and  $\nu$  to  $-0.2$ .

| Game    | $\lambda$ | $\nu$  | $ \mathbb{C} $ | ETL tasks      |                |                |                |
|---------|-----------|--------|----------------|----------------|----------------|----------------|----------------|
|         |           |        |                | Discrimination | Classification | Attribute      | Reconstruction |
| LG (RL) | -         | -      | 1024           | 0.26<br>(0.03) | 0.00<br>(0.00) | 0.85<br>(0.00) | 5871<br>(155)  |
| NLG     | 0.5       | -      | 1024           | 0.31<br>(0.04) | 0.00<br>(0.00) | 0.85<br>(0.00) | 5833<br>(103)  |
| MRILG   | 0.5       | $-0.2$ | 1024           | 0.30<br>(0.06) | 0.00<br>(0.00) | 0.85<br>(0.00) | 5820<br>(92)   |

same reasoning since the obtained losses were similar for the *idk* reward of  $-0.5$  and  $-0.2$ , having mean values of 5686 and 5644, respectively. The loss when  $\nu = -0.05$  was higher at 6182.

Addressing now the noisy train/test regime, we observe, for each task, the same behavior as the deterministic regime. Focusing on the Discrimination task and similar to the deterministic train/test regime, the test accuracy is higher for the *idk* rewards of  $-0.5$  and  $-0.2$  than the remaining level. The same happens for the Attribute task where the *idk* rewards of  $-0.5$  and  $-0.2$  obtain the same value (0.85) against a slight decrease for the  $-0.05$  level (0.83). As such, we conclude that the same behavior occurs in the noisy regime, indicating that the noise robustness lowers when the *idk* reward is too small. We also observe this in the Reconstruction task where the loss values are lower for the *idk* reward values of  $-0.5$  and  $-0.2$ , against the value of  $-0.05$ .

#### F.6.4 VARYING NUMBER OF CANDIDATES

Finally, we study the last axis of the predominant hyper-parameters, which is the number of candidates. We do a quick analysis since the results comply with the main evaluation (Section 3.2.3), where increasing the number of candidates is essential to improve performance. By increasing the number of candidates, the Listener receives a broader variety of samples, facilitating learning and recalling unique and valuable information to discriminate all candidates. Consequently, a more sophisticated communication protocol is necessary as the number of candidates increases since the discriminative task becomes more difficult. For this evaluation and similar to the previous ones, we fix the noise at 0.5 and the *idk* reward at  $-0.2$ . The results are for the following game variants: LG (RL), NLG, and MRILG.

Tables 27 and 29 display the results for the ImageNet dataset employing the deterministic and noisy regimes, respectively. Looking at the Discrimination task, we observe an increase in test accuracy for all tasks as the number of candidates (used in the original RL task) scales up. Another important and related observation is that the gap between accuracies decreases in the noisy train/test regime. For example, in the regular regime (deterministic), the gap between 256 and 1024 candidates for LG (RL) and MRILG variants is about 0.11 and 0.07, respectively. On the other hand, the gaps for the same variants in the noisy regime are 0.08 and 0.05, respectively.

A similar outcome occurs for the results obtained when training with the CelebA dataset, Tables 28 and 30 display the results for the deterministic and noisy regimes, respectively. In the case of the

Table 23: Test accuracy, with SD, of every ETL task trained, using the ImageNet dataset and over 10 seeds. We do not apply noise during ETL’s train and test phase. During the LG training (before ETL), we fixed  $|\mathcal{C}|$  to 1024 and  $\lambda$  to 0.5.

| Game  | $\lambda$ | $\nu$ | $ \mathcal{C} $ | ETL tasks      |                |
|-------|-----------|-------|-----------------|----------------|----------------|
|       |           |       |                 | Discrimination | Classification |
| MRILG | 0.5       | −0.5  | 1024            | 0.82<br>(0.03) | 0.12<br>(0.02) |
| MRILG | 0.5       | −0.2  | 1024            | 0.86<br>(0.03) | 0.13<br>(0.01) |
| MRILG | 0.5       | −0.05 | 1024            | 0.65<br>(0.34) | 0.09<br>(0.05) |

Table 24: Test accuracy, with SD, of every ETL task trained, using the ImageNet dataset and over 10 seeds. We do not apply noise during ETL’s train and test phase. During the LG training (before ETL), we fixed  $|\mathcal{C}|$  to 1024 and  $\lambda$  to 0.5.

| Game  | $\lambda$ | $\nu$ | $ \mathcal{C} $ | ETL tasks      |                |                |                |
|-------|-----------|-------|-----------------|----------------|----------------|----------------|----------------|
|       |           |       |                 | Discrimination | Classification | Attribute      | Reconstruction |
| MRILG | 0.5       | −0.5  | 1024            | 0.59<br>(0.09) | 0.00<br>(0.00) | 0.85<br>(0.00) | 5686<br>(121)  |
| MRILG | 0.5       | −0.2  | 1024            | 0.58<br>(0.12) | 0.00<br>(0.00) | 0.85<br>(0.00) | 5644<br>(121)  |
| MRILG | 0.5       | −0.05 | 1024            | 0.28<br>(0.32) | 0.00<br>(0.00) | 0.83<br>(0.02) | 6182<br>(466)  |

Discrimination and Reconstruction tasks applied in both train/test regimes, there is a clear benefit of having a Speaker trained in a more complex RL task (increased number of candidates). As such, we observe that the test accuracy increases for the Discrimination task as the number of candidates increases for all LG variants. Comparatively, the loss obtained at evaluation time for the Reconstruction task also decreases as the number of candidates increases. The performance gap is also more visible in the deterministic regime, where no message noise is involved. As an illustration, consider the Discrimination task where the growth in accuracy for the MRILG variant, when increasing the number of candidates from 256 to 1024, is 0.24 and 0.13, referring to the deterministic and noise regimes, respectively. Comparatively, looking at the Reconstruction task and the same LG variant, the increment in the test loss from 256 to 1024 candidates is 125 and 58 for the deterministic and noisy train/test regimes, respectively. Finally, addressing the Attribute task, we observe no significant improvements in performance when expanding the number of candidates. Similarly to the previous evaluation analyses (Appendix F.6.2), the test accuracy stays fixed at 0.85/0.86.

#### F.6.5 PARTICULAR ANALYSIS OF THE CLASSIFICATION TASK

To conclude the ETL study, we now focus on the Classification task for both datasets (ImageNet and CelebA). In all experiments, the test accuracy is not higher than 0.15 and 0.01 when considering the ImageNet and CelebA datasets, respectively. We argue that this outcome is a consequence of the encoding qualities of the communication protocol. With these results, there is strong evidence that the emerged communication protocol does not encode any particular information about the class of each image since such information is irrelevant to solve the original setting (discriminating between images). Therefore, since the Listener architecture for the Classification task only receives the message sent by the Speaker as input, and it has no helpful information to solve the task.

## G ADDITIONAL RESULTS

Continuing the evaluation present in Section 3, we present all tests performed for each LG variants with different hyperparameters, see Tables 39 to 46.

Table 25: Test accuracy, with SD, of every ETL task trained, using the ImageNet dataset and over 10 seeds. We fix the noise during ETL’s train and test phase at 0.5. During the LG training (before ETL), we fixed  $|\mathbb{C}|$  to 1024 and  $\lambda$  to 0.5.

| Game  | $\lambda$ | $\nu$ | $ \mathbb{C} $ | ETL tasks      |                |
|-------|-----------|-------|----------------|----------------|----------------|
|       |           |       |                | Discrimination | Classification |
| MRILG | 0.5       | −0.5  | 1024           | 0.40<br>(0.02) | 0.07<br>(0.01) |
| MRILG | 0.5       | −0.2  | 1024           | 0.41<br>(0.01) | 0.07<br>(0.01) |
| MRILG | 0.5       | −0.05 | 1024           | 0.31<br>(0.16) | 0.05<br>(0.03) |

Table 26: Test accuracy, with SD, of every ETL task trained, using the CelebA dataset and over 10 seeds. We fix the noise during ETL’s train and test phase at 0.5. During the LG training (before ETL), we fixed  $|\mathbb{C}|$  to 1024 and  $\lambda$  to 0.5.

| Game  | $\lambda$ | $\nu$ | $ \mathbb{C} $ | ETL tasks      |                |                |                |
|-------|-----------|-------|----------------|----------------|----------------|----------------|----------------|
|       |           |       |                | Discrimination | Classification | Attribute      | Reconstruction |
| MRILG | 0.5       | −0.5  | 1024           | 0.30<br>(0.04) | 0.00<br>(0.00) | 0.85<br>(0.00) | 5860<br>(95)   |
| MRILG | 0.5       | −0.2  | 1024           | 0.30<br>(0.06) | 0.00<br>(0.00) | 0.85<br>(0.00) | 5820<br>(92)   |
| MRILG | 0.5       | −0.05 | 1024           | 0.14<br>(0.15) | 0.00<br>(0.00) | 0.83<br>(0.02) | 6275<br>(374)  |

Table 27: Test accuracy, with SD, of every ETL task trained, using the ImageNet dataset and over 10 seeds. We do not apply noise during ETL’s train and test phase. During the LG training (before ETL), we fixed  $\lambda$  to 0.5 and  $\nu$  to −0.2.

| Game    | $\lambda$ | $\nu$ | $ \mathbb{C} $ | ETL tasks      |                |
|---------|-----------|-------|----------------|----------------|----------------|
|         |           |       |                | Discrimination | Classification |
| LG (RL) | -         | -     | 16             | 0.37<br>(0.06) | 0.07<br>(0.01) |
| LG (RL) | -         | -     | 64             | 0.64<br>(0.09) | 0.07<br>(0.01) |
| LG (RL) | -         | -     | 256            | 0.80<br>(0.04) | 0.13<br>(0.01) |
| LG (RL) | -         | -     | 1024           | 0.88<br>(0.01) | 0.14<br>(0.01) |
| NLG     | 0.5       | -     | 16             | 0.30<br>(0.05) | 0.07<br>(0.01) |
| NLG     | 0.5       | -     | 64             | 0.54<br>(0.05) | 0.07<br>(0.01) |
| NLG     | 0.5       | -     | 256            | 0.77<br>(0.04) | 0.13<br>(0.01) |
| NLG     | 0.5       | -     | 1024           | 0.85<br>(0.03) | 0.14<br>(0.02) |
| MRILG   | 0.5       | −0.2  | 16             | 0.25<br>(0.14) | 0.05<br>(0.03) |
| MRILG   | 0.5       | −0.2  | 64             | 0.51<br>(0.19) | 0.09<br>(0.03) |
| MRILG   | 0.5       | −0.2  | 256            | 0.76<br>(0.05) | 0.12<br>(0.02) |
| MRILG   | 0.5       | −0.2  | 1024           | 0.86<br>(0.03) | 0.13<br>(0.01) |



Table 28: Test accuracy, with SD, of every ETL task trained, using the CelebA dataset and over 10 seeds. We do not apply noise during ETL’s train and test phase. During the LG training (before ETL), we fixed  $\lambda$  to 0.5 and  $\nu$  to  $-0.2$ .

| Game    | $\lambda$ | $\nu$  | $ \mathbb{C} $ | ETL tasks      |                |                |                     |
|---------|-----------|--------|----------------|----------------|----------------|----------------|---------------------|
|         |           |        |                | Discrimination | Classification | Attribute      | Reconstruction      |
| LG (RL) | -         | -      | 16             | 0.17<br>(0.07) | 0.00<br>(0.00) | 0.85<br>(0.00) | 6050<br>(50)        |
| LG (RL) | -         | -      | 64             | 0.34<br>(0.11) | 0.00<br>(0.00) | 0.85<br>(0.00) | 6012<br>(121)       |
| LG (RL) | -         | -      | 256            | 0.48<br>(0.09) | 0.00<br>(0.00) | 0.86<br>(0.00) | 5750<br>(1544)      |
| LG (RL) | -         | -      | 1024           | 0.65<br>(0.09) | 0.01<br>(0.00) | 0.86<br>(0.00) | 5633<br>(127)       |
| NLG     | 0.5       | -      | 16             | 0.16<br>(0.06) | 0.00<br>(0.00) | 0.85<br>(0.00) | 6070.97<br>(79.74)  |
| NLG     | 0.5       | -      | 64             | 0.24<br>(0.08) | 0.00<br>(0.00) | 0.85<br>(0.00) | 5992.45<br>(163.82) |
| NLG     | 0.5       | -      | 256            | 0.37<br>(0.10) | 0.00<br>(0.00) | 0.85<br>(0.00) | 5814.56<br>(191.90) |
| NLG     | 0.5       | -      | 1024           | 0.54<br>(0.01) | 0.00<br>(0.00) | 0.85<br>(0.00) | 5686.76<br>(157.08) |
| MRILG   | 0.5       | $-0.2$ | 16             | 0.09<br>(0.05) | 0.00<br>(0.00) | 0.85<br>(0.00) | 6179.81<br>(108.45) |
| MRILG   | 0.5       | $-0.2$ | 64             | 0.20<br>(0.09) | 0.00<br>(0.00) | 0.85<br>(0.00) | 6057.76<br>(205.67) |
| MRILG   | 0.5       | $-0.2$ | 256            | 0.44<br>(0.12) | 0.00<br>(0.00) | 0.85<br>(0.00) | 5696.28<br>(42.08)  |
| MRILG   | 0.5       | $-0.2$ | 1024           | 0.70<br>(0.02) | 0.01<br>(0.00) | 0.86<br>(0.00) | 5571.15<br>(64.40)  |

Table 29: Test accuracy, with SD, of every ETL task trained, using the ImageNet dataset and over 10 seeds. We fix the noise during ETL’s train and test phase at 0.5. During the LG training (before ETL), we fixed  $\lambda$  to 0.5 and  $\nu$  to  $-0.2$ .

| Game    | $\lambda$ | $\nu$  | $ \mathbb{C} $ | ETL tasks      |                |
|---------|-----------|--------|----------------|----------------|----------------|
|         |           |        |                | Discrimination | Classification |
| LG (RL) | -         | -      | 16             | 0.11<br>(0.01) | 0.04<br>(0.00) |
| LG (RL) | -         | -      | 64             | 0.22<br>(0.03) | 0.06<br>(0.01) |
| LG (RL) | -         | -      | 256            | 0.31<br>(0.02) | 0.06<br>(0.00) |
| LG (RL) | -         | -      | 1024           | 0.36<br>(0.02) | 0.07<br>(0.00) |
| NLG     | 0.5       | -      | 16             | 0.13<br>(0.02) | 0.04<br>(0.00) |
| NLG     | 0.5       | -      | 64             | 0.23<br>(0.02) | 0.04<br>(0.00) |
| NLG     | 0.5       | -      | 256            | 0.35<br>(0.02) | 0.08<br>(0.00) |
| NLG     | 0.5       | -      | 1024           | 0.41<br>(0.02) | 0.08<br>(0.01) |
| MRILG   | 0.5       | $-0.2$ | 16             | 0.11<br>(0.06) | 0.03<br>(0.02) |
| MRILG   | 0.5       | $-0.2$ | 64             | 0.21<br>(0.08) | 0.05<br>(0.02) |
| MRILG   | 0.5       | $-0.2$ | 256            | 0.35<br>(0.03) | 0.07<br>(0.01) |
| MRILG   | 0.5       | $-0.2$ | 1024           | 0.41<br>(0.01) | 0.07<br>(0.01) |

Table 30: Test accuracy, with SD, of every ETL task trained, using the CelebA dataset and over 10 seeds. We fix the noise during ETL’s train and test phase at 0.5. During the LG training (before ETL), we fixed  $\lambda$  to 0.5 and  $\nu$  to  $-0.2$ .

| Game    | $\lambda$ | $\nu$  | $ \mathbb{C} $ | ETL tasks      |                |                |                |
|---------|-----------|--------|----------------|----------------|----------------|----------------|----------------|
|         |           |        |                | Discrimination | Classification | Attribute      | Reconstruction |
| LG (RL) | 0         | -      | 16             | 0.06<br>(0.02) | 0.00<br>(0.00) | 0.85<br>(0.00) | 6210<br>(53)   |
| LG (RL) | 0         | -      | 64             | 0.13<br>(0.03) | 0.00<br>(0.00) | 0.85<br>(0.00) | 6061<br>(140)  |
| LG (RL) | 0         | -      | 256            | 0.19<br>(0.03) | 0.00<br>(0.00) | 0.85<br>(0.00) | 5896<br>(117)  |
| LG (RL) | 0         | -      | 1024           | 0.26<br>(0.03) | 0.00<br>(0.00) | 0.85<br>(0.00) | 5871<br>(155)  |
| NLG     | 0.5       | -      | 16             | 0.06<br>(0.02) | 0.00<br>(0.00) | 0.85<br>(0.00) | 6196<br>(73)   |
| NLG     | 0.5       | -      | 64             | 0.11<br>(0.04) | 0.00<br>(0.00) | 0.85<br>(0.00) | 6096<br>(110)  |
| NLG     | 0.5       | -      | 256            | 0.20<br>(0.04) | 0.00<br>(0.00) | 0.85<br>(0.00) | 5968<br>(160)  |
| NLG     | 0.5       | -      | 1024           | 0.31<br>(0.04) | 0.00<br>(0.00) | 0.85<br>(0.00) | 5833<br>(103)  |
| MRILG   | 0.5       | $-0.2$ | 16             | 0.07<br>(0.03) | 0.00<br>(0.00) | 0.85<br>(0.00) | 6203<br>(76)   |
| MRILG   | 0.5       | $-0.2$ | 64             | 0.12<br>(0.05) | 0.00<br>(0.00) | 0.85<br>(0.00) | 6116<br>(234)  |
| MRILG   | 0.5       | $-0.2$ | 256            | 0.25<br>(0.04) | 0.00<br>(0.00) | 0.85<br>(0.00) | 5844<br>(92)   |
| MRILG   | 0.5       | $-0.2$ | 1024           | 0.30<br>(0.06) | 0.00<br>(0.00) | 0.85<br>(0.00) | 5820<br>(85)   |

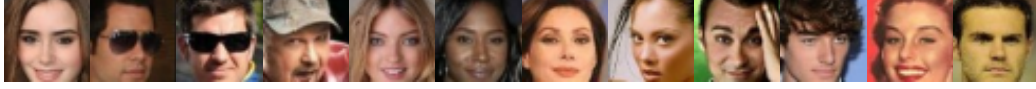

(a) Original CelebA images, randomly selected.

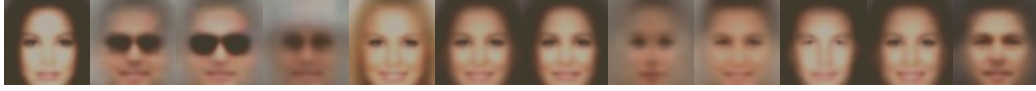

(b) LG (SS), train/test ETL Reconstruction task without noise.

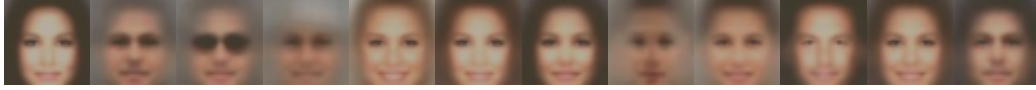

(c) LG (SS), train/test ETL Reconstruction task with a noise level of 0.25.

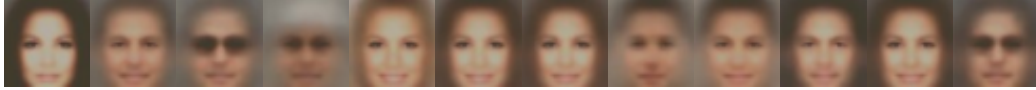

(d) LG (SS), train/test ETL Reconstruction task with a noise level of 0.5.

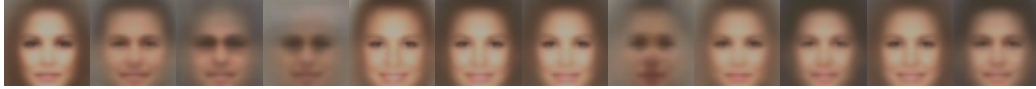

(e) LG (SS), train/test ETL Reconstruction task with a noise level of 0.75.

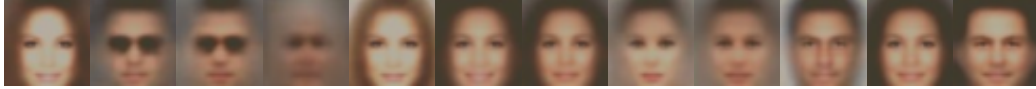

(f) LG (RL), train/test ETL Reconstruction task without noise.

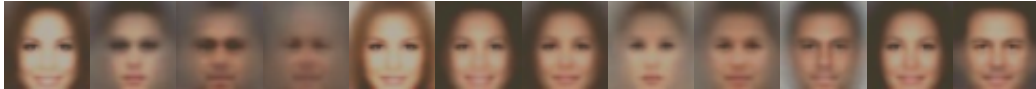

(g) LG (RL), train/test ETL Reconstruction task with a noise level of 0.25.

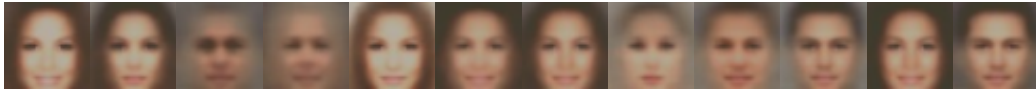

(h) LG (RL), train/test ETL Reconstruction task with a noise level of 0.5.

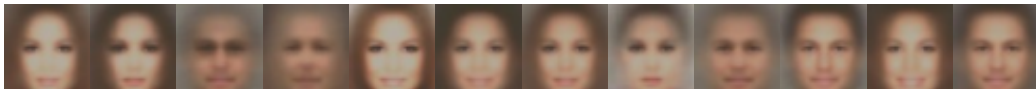

(i) LG (RL), train/test ETL Reconstruction task with a noise level of 0.75.

Figure 9: Random outputs of ETL’s Reconstruction task when using a Speaker trained in LG (SS) and LG (RL) games. We report reconstructions when training and testing without (Figures 9b and 9f) and with noise (Figures 9c to 9e and 9g to 9i), in the ETL task. The faces shown in each column are a reconstruction of the original images available in the matching columns of Figure 9a.

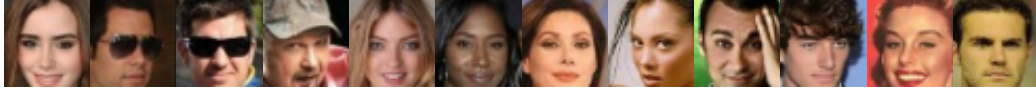

(a) Original CelebA images, randomly selected.

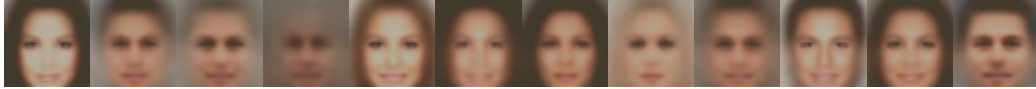

(b) NLG with  $\lambda = 0.25$ , train/test ETL Reconstruction task without noise.

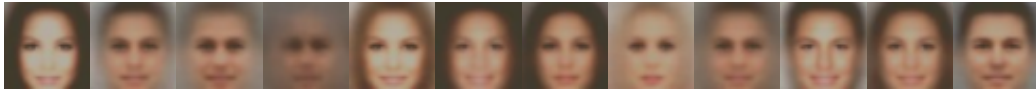

(c) NLG with  $\lambda = 0.25$ , train/test ETL Reconstruction task with a noise level of 0.25.

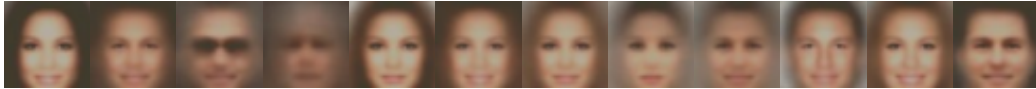

(d) NLG with  $\lambda = 0.5$ , train/test ETL Reconstruction task without noise.

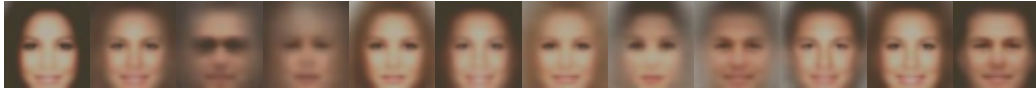

(e) NLG with  $\lambda = 0.5$ , train/test ETL Reconstruction task with a noise level of 0.75.

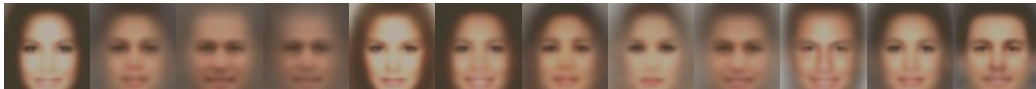

(f) NLG with  $\lambda = 0.75$ , train/test ETL Reconstruction task without noise.

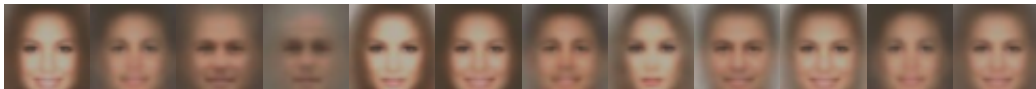

(g) NLG with  $\lambda = 0.75$ , train/test ETL Reconstruction task with a noise level of 0.25.

Figure 10: Random outputs of ETL’s Reconstruction task when using a Speaker trained in the NLG. We report reconstructions when training and testing without (Figures 10b, 10d and 10f) and with noise (Figures 10c, 10e and 10g), in the ETL task. The faces shown in each column are a reconstruction of the original images available in the matching column of Figure 10a.

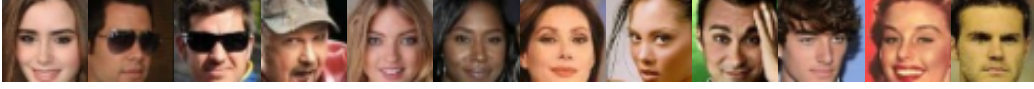

(a) Original CelebA images, randomly selected.

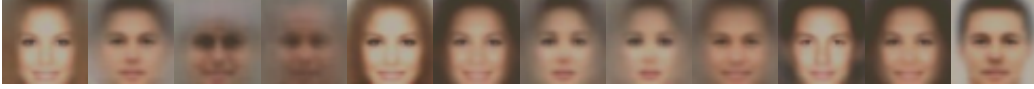

(b) MRILG with  $\lambda = 0.25$  and  $\nu = -0.5$ , train/test ETL Reconstruction task without noise.

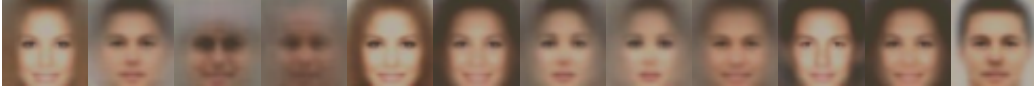

(c) MRILG with  $\lambda = 0.25$  and  $\nu = -0.5$ , train/test ETL Reconstruction task with a noise level of 0.25.

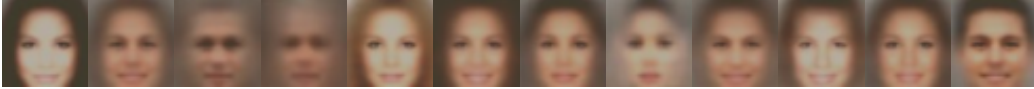

(d) MRILG with  $\lambda = 0.25$  and  $\nu = -0.2$ , train/test ETL Reconstruction task without noise.



(e) MRILG with  $\lambda = 0.25$  and  $\nu = -0.2$ , train/test ETL Reconstruction task with a noise level of 0.25.

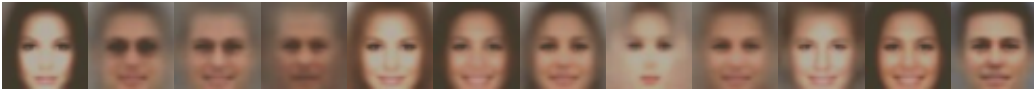

(f) MRILG with  $\lambda = 0.25$  and  $\nu = -0.05$ , train/test ETL Reconstruction task without noise.

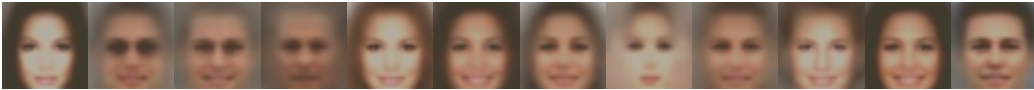

(g) MRILG with  $\lambda = 0.25$  and  $\nu = -0.05$ , train/test ETL Reconstruction task with a noise level of 0.25.

Figure 11: Random outputs of ETL’s Reconstruction task when using a Speaker trained in the MRILG, with noise  $\lambda = 0.25$ . We report reconstructions when training and testing without (Figures 11b, 11d and 11f) and with noise (Figures 11c, 11e and 11g), in the ETL task. The faces shown in each column are a reconstruction of the original images available in the matching column of Figure 11a.



(a) Original CelebA images, randomly selected.

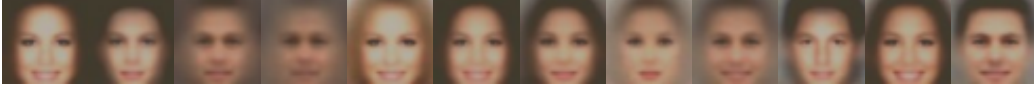

(b) MRILG with  $\lambda = 0.5$  and  $\nu = -0.5$ , train/test ETL Reconstruction task without noise.

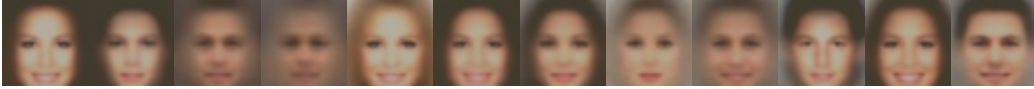

(c) MRILG with  $\lambda = 0.5$  and  $\nu = -0.5$ , train/test ETL Reconstruction task with a noise level of 0.5.

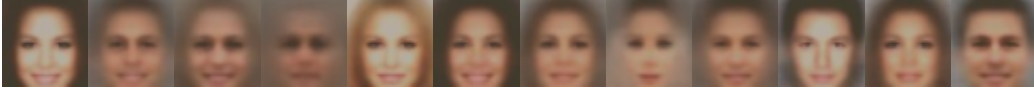

(d) MRILG with  $\lambda = 0.5$  and  $\nu = -0.2$ , train/test ETL Reconstruction task without noise.



(e) MRILG with  $\lambda = 0.5$  and  $\nu = -0.2$ , train/test ETL Reconstruction task with a noise level of 0.5.

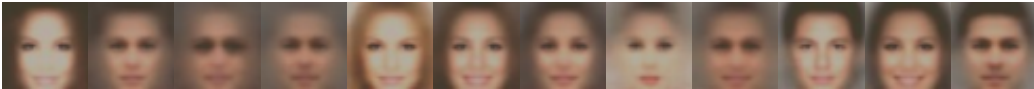

(f) MRILG with  $\lambda = 0.5$  and  $\nu = -0.05$ , train/test ETL Reconstruction task without noise.

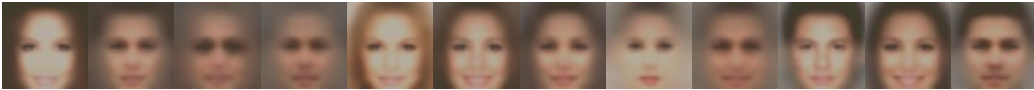

(g) MRILG with  $\lambda = 0.5$  and  $\nu = -0.05$ , train/test ETL Reconstruction task with a noise level of 0.5.

Figure 12: Random outputs of ETL’s Reconstruction task when using a Speaker trained in the MRILG, with noise  $\lambda = 0.25$ . We report reconstructions when training and testing without (Figures 12b, 12d and 12f) and with noise (Figures 12c, 12e and 12g), in the ETL task. The faces shown in each column are a reconstruction of the original images available in the matching column of Figure 12a.





(a) Original CelebA images, randomly selected.

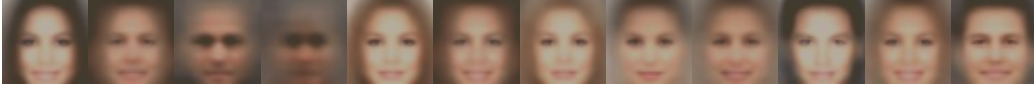

(b) MRILG with  $\lambda = 0.75$  and  $\nu = -0.5$ , train/test ETL Reconstruction task without noise.

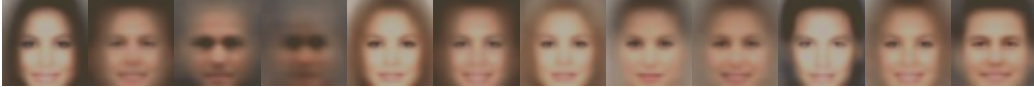

(c) MRILG with  $\lambda = 0.75$  and  $\nu = -0.5$ , train/test ETL Reconstruction task with a noise level of 0.5.

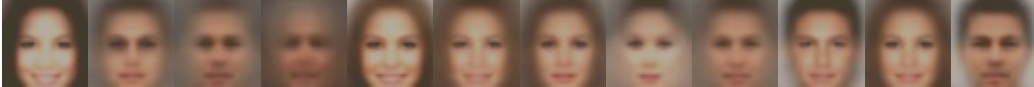

(d) MRILG with  $\lambda = 0.75$  and  $\nu = -0.2$ , train/test ETL Reconstruction task without noise.



(e) MRILG with  $\lambda = 0.75$  and  $\nu = -0.2$ , train/test ETL Reconstruction task with a noise level of 0.75.

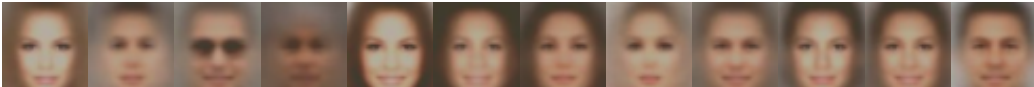

(f) MRILG with  $\lambda = 0.75$  and  $\nu = -0.05$ , train/test ETL Reconstruction task without noise.

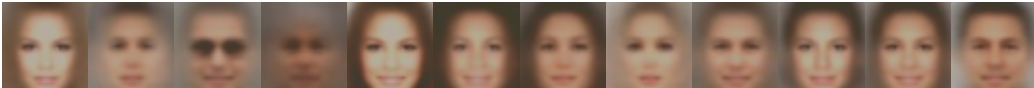

(g) MRILG with  $\lambda = 0.75$  and  $\nu = -0.05$ , train/test ETL Reconstruction task with a noise level of 0.75.

Figure 13: Random outputs of ETL’s Reconstruction task when using a Speaker trained in the MRILG, with noise  $\lambda = 0.25$ . We report reconstructions when training and testing without (Figures 13b, 13d and 13f) and with noise (Figures 13c, 13e and 13g), in the ETL task. The faces shown in each column are a reconstruction of the original images available in the matching column of Figure 13a.

Table 31: Test accuracy, with SD, of every ETL task trained, using the ImageNet dataset and over 10 seeds. We do not apply noise during ETL’s train and test phase.

| Game    | $\lambda$ | $\nu$ | $ \mathbb{C} $ | Discrimination | Classification |
|---------|-----------|-------|----------------|----------------|----------------|
| LG (SS) | 0         | 0     | 16             | 0.23<br>(0.02) | 0.08<br>(0.01) |
| LG (SS) | 0         | 0     | 64             | 0.33<br>(0.06) | 0.11<br>(0.01) |
| LG (SS) | 0         | 0     | 256            | 0.44<br>(0.05) | 0.13<br>(0.01) |
| LG (SS) | 0         | 0     | 1024           | 0.58<br>(0.05) | 0.14<br>(0.01) |
| LG (RL) | 0         | 0     | 16             | 0.37<br>(0.06) | 0.07<br>(0.01) |
| LG (RL) | 0         | 0     | 64             | 0.64<br>(0.09) | 0.11<br>(0.02) |
| LG (RL) | 0         | 0     | 256            | 0.80<br>(0.04) | 0.13<br>(0.01) |
| LG (RL) | 0         | 0     | 1024           | 0.88<br>(0.01) | 0.14<br>(0.01) |
| NLG     | 0.25      | 0     | 16             | 0.37<br>(0.08) | 0.08<br>(0.02) |
| NLG     | 0.25      | 0     | 64             | 0.63<br>(0.03) | 0.10<br>(0.00) |
| NLG     | 0.25      | 0     | 256            | 0.81<br>(0.03) | 0.13<br>(0.01) |
| NLG     | 0.25      | 0     | 1024           | 0.86<br>(0.03) | 0.14<br>(0.02) |
| NLG     | 0.5       | 0     | 16             | 0.30<br>(0.05) | 0.07<br>(0.01) |
| NLG     | 0.5       | 0     | 64             | 0.54<br>(0.05) | 0.10<br>(0.01) |
| NLG     | 0.5       | 0     | 256            | 0.77<br>(0.04) | 0.13<br>(0.01) |
| NLG     | 0.5       | 0     | 1024           | 0.85<br>(0.03) | 0.14<br>(0.02) |
| NLG     | 0.75      | 0     | 16             | 0.22<br>(0.04) | 0.06<br>(0.01) |
| NLG     | 0.75      | 0     | 64             | 0.44<br>(0.04) | 0.08<br>(0.01) |
| NLG     | 0.75      | 0     | 256            | 0.66<br>(0.05) | 0.11<br>(0.01) |
| NLG     | 0.75      | 0     | 1024           | 0.80<br>(0.03) | 0.14<br>(0.02) |
| MRILG   | 0.25      | -0.5  | 16             | 0.32<br>(0.06) | 0.06<br>(0.01) |
| MRILG   | 0.25      | -0.5  | 64             | 0.64<br>(0.06) | 0.11<br>(0.01) |
| MRILG   | 0.25      | -0.5  | 256            | 0.78<br>(0.04) | 0.12<br>(0.01) |
| MRILG   | 0.25      | -0.5  | 1024           | 0.87<br>(0.04) | 0.14<br>(0.02) |
| MRILG   | 0.25      | -0.2  | 16             | 0.33<br>(0.12) | 0.07<br>(0.02) |
| MRILG   | 0.25      | -0.2  | 64             | 0.50<br>(0.27) | 0.09<br>(0.05) |
| MRILG   | 0.25      | -0.2  | 256            | 0.72<br>(0.25) | 0.12<br>(0.04) |



Table 31: Continued from previous page.

|       |      |       |      |        |        |
|-------|------|-------|------|--------|--------|
| MRILG | 0.25 | -0.2  | 1024 | 0.86   | 0.13   |
|       |      |       |      | (0.03) | (0.01) |
| MRILG | 0.25 | -0.05 | 16   | 0.19   | 0.05   |
|       |      |       |      | (0.15) | (0.03) |
| MRILG | 0.25 | -0.05 | 64   | 0.49   | 0.09   |
|       |      |       |      | (0.21) | (0.04) |
| MRILG | 0.25 | -0.05 | 256  | 0.77   | 0.12   |
|       |      |       |      | (0.05) | (0.01) |
| MRILG | 0.25 | -0.05 | 1024 | 0.83   | 0.12   |
|       |      |       |      | (0.06) | (0.02) |
| MRILG | 0.5  | -0.5  | 16   | 0.32   | 0.07   |
|       |      |       |      | (0.05) | (0.01) |
| MRILG | 0.5  | -0.5  | 64   | 0.61   | 0.11   |
|       |      |       |      | (0.05) | (0.01) |
| MRILG | 0.5  | -0.5  | 256  | 0.79   | 0.13   |
|       |      |       |      | (0.02) | (0.01) |
| MRILG | 0.5  | -0.5  | 1024 | 0.82   | 0.12   |
|       |      |       |      | (0.03) | (0.02) |
| MRILG | 0.5  | -0.2  | 16   | 0.25   | 0.05   |
|       |      |       |      | (0.14) | (0.03) |
| MRILG | 0.5  | -0.2  | 64   | 0.51   | 0.09   |
|       |      |       |      | (0.19) | (0.03) |
| MRILG | 0.5  | -0.2  | 256  | 0.76   | 0.12   |
|       |      |       |      | (0.05) | (0.02) |
| MRILG | 0.5  | -0.2  | 1024 | 0.86   | 0.13   |
|       |      |       |      | (0.03) | (0.01) |
| MRILG | 0.5  | -0.05 | 16   | 0.17   | 0.04   |
|       |      |       |      | (0.13) | (0.03) |
| MRILG | 0.5  | -0.05 | 64   | 0.42   | 0.07   |
|       |      |       |      | (0.23) | (0.04) |
| MRILG | 0.5  | -0.05 | 256  | 0.60   | 0.10   |
|       |      |       |      | (0.32) | (0.05) |
| MRILG | 0.5  | -0.05 | 1024 | 0.65   | 0.09   |
|       |      |       |      | (0.34) | (0.05) |
| MRILG | 0.75 | -0.5  | 16   | 0.23   | 0.06   |
|       |      |       |      | (0.04) | (0.01) |
| MRILG | 0.75 | -0.5  | 64   | 0.46   | 0.09   |
|       |      |       |      | (0.05) | (0.01) |
| MRILG | 0.75 | -0.5  | 256  | 0.67   | 0.12   |
|       |      |       |      | (0.04) | (0.02) |
| MRILG | 0.75 | -0.5  | 1024 | 0.76   | 0.13   |
|       |      |       |      | (0.06) | (0.01) |
| MRILG | 0.75 | -0.2  | 16   | 0.24   | 0.06   |
|       |      |       |      | (0.04) | (0.01) |
| MRILG | 0.75 | -0.2  | 64   | 0.41   | 0.08   |
|       |      |       |      | (0.16) | (0.03) |
| MRILG | 0.75 | -0.2  | 256  | 0.54   | 0.09   |
|       |      |       |      | (0.29) | (0.05) |
| MRILG | 0.75 | -0.2  | 1024 | 0.77   | 0.13   |
|       |      |       |      | (0.05) | (0.02) |
| MRILG | 0.75 | -0.05 | 16   | 0.11   | 0.03   |
|       |      |       |      | (0.12) | (0.03) |
| MRILG | 0.75 | -0.05 | 64   | 0.25   | 0.05   |
|       |      |       |      | (0.22) | (0.04) |
| MRILG | 0.75 | -0.05 | 256  | 0.68   | 0.11   |
|       |      |       |      | (0.04) | (0.01) |
| MRILG | 0.75 | -0.05 | 1024 | 0.47   | 0.08   |
|       |      |       |      | (0.37) | (0.06) |

Table 32: Test accuracy, with SD, of every ETL task trained, using the CelebA dataset and over 10 seeds. We do not apply noise during ETL’s train and test phase.

| Game    | $\lambda$ | $\nu$ | $ \mathbb{C} $ | Discrimination | Classification | Attribute      | Reconstruction |
|---------|-----------|-------|----------------|----------------|----------------|----------------|----------------|
| LG (SS) | 0         | 0     | 16             | 0.18<br>(0.04) | 0.00<br>(0.00) | 0.85<br>(0.00) | 6094<br>(84)   |
| LG (SS) | 0         | 0     | 64             | 0.31<br>(0.02) | 0.00<br>(0.00) | 0.86<br>(0.00) | 5971<br>(78)   |
| LG (SS) | 0         | 0     | 256            | 0.39<br>(0.06) | 0.01<br>(0.00) | 0.86<br>(0.00) | 5852<br>(122)  |
| LG (SS) | 0         | 0     | 1024           | 0.44<br>(0.05) | 0.01<br>(0.00) | 0.86<br>(0.00) | 5814<br>(74)   |
| LG (RL) | 0         | 0     | 16             | 0.15<br>(0.06) | 0.00<br>(0.00) | 0.85<br>(0.00) | 6110<br>(79)   |
| LG (RL) | 0         | 0     | 64             | 0.33<br>(0.08) | 0.00<br>(0.00) | 0.85<br>(0.00) | 5930<br>(178)  |
| LG (RL) | 0         | 0     | 256            | 0.47<br>(0.11) | 0.00<br>(0.00) | 0.86<br>(0.00) | 5710<br>(167)  |
| LG (RL) | 0         | 0     | 1024           | 0.62<br>(0.08) | 0.01<br>(0.00) | 0.85<br>(0.00) | 5671<br>(192)  |
| NLG     | 0.25      | 0     | 16             | 0.15<br>(0.07) | 0.00<br>(0.00) | 0.85<br>(0.00) | 6123<br>(99)   |
| NLG     | 0.25      | 0     | 64             | 0.27<br>(0.08) | 0.00<br>(0.00) | 0.85<br>(0.00) | 5995<br>(148)  |
| NLG     | 0.25      | 0     | 256            | 0.47<br>(0.10) | 0.00<br>(0.00) | 0.85<br>(0.00) | 5754<br>(154)  |
| NLG     | 0.25      | 0     | 1024           | 0.61<br>(0.09) | 0.01<br>(0.00) | 0.85<br>(0.00) | 5689<br>(87)   |
| NLG     | 0.5       | 0     | 16             | 0.13<br>(0.04) | 0.00<br>(0.00) | 0.85<br>(0.00) | 6142<br>(91)   |
| NLG     | 0.5       | 0     | 64             | 0.22<br>(0.08) | 0.00<br>(0.00) | 0.85<br>(0.00) | 6011<br>(135)  |
| NLG     | 0.5       | 0     | 256            | 0.38<br>(0.10) | 0.00<br>(0.00) | 0.85<br>(0.00) | 5859<br>(181)  |
| NLG     | 0.5       | 0     | 1024           | 0.60<br>(0.10) | 0.00<br>(0.00) | 0.85<br>(0.00) | 5659<br>(129)  |
| NLG     | 0.75      | 0     | 16             | 0.11<br>(0.06) | 0.00<br>(0.00) | 0.85<br>(0.00) | 6164<br>(104)  |
| NLG     | 0.75      | 0     | 64             | 0.24<br>(0.06) | 0.00<br>(0.00) | 0.85<br>(0.00) | 5957<br>(101)  |
| NLG     | 0.75      | 0     | 256            | 0.37<br>(0.09) | 0.00<br>(0.00) | 0.85<br>(0.00) | 5816<br>(141)  |
| NLG     | 0.75      | 0     | 1024           | 0.59<br>(0.08) | 0.00<br>(0.00) | 0.85<br>(0.00) | 5679<br>(78)   |
| MRILG   | 0.25      | -0.5  | 16             | 0.14<br>(0.05) | 0.00<br>(0.00) | 0.85<br>(0.00) | 6113<br>(126)  |
| MRILG   | 0.25      | -0.5  | 64             | 0.29<br>(0.05) | 0.00<br>(0.00) | 0.85<br>(0.00) | 5949<br>(102)  |
| MRILG   | 0.25      | -0.5  | 256            | 0.46<br>(0.11) | 0.00<br>(0.00) | 0.85<br>(0.00) | 5736<br>(105)  |
| MRILG   | 0.25      | -0.5  | 1024           | 0.65<br>(0.10) | 0.01<br>(0.00) | 0.85<br>(0.00) | 5621<br>(109)  |
| MRILG   | 0.25      | -0.2  | 16             | 0.14<br>(0.06) | 0.00<br>(0.00) | 0.85<br>(0.00) | 6144<br>(69)   |
| MRILG   | 0.25      | -0.2  | 64             | 0.25<br>(0.14) | 0.00<br>(0.00) | 0.85<br>(0.01) | 5992<br>(283)  |
| MRILG   | 0.25      | -0.2  | 256            | 0.41<br>(0.18) | 0.00<br>(0.00) | 0.85<br>(0.02) | 5871<br>(328)  |

Table 32: Continued from previous page.

|       |      |       |      |        |        |        |       |
|-------|------|-------|------|--------|--------|--------|-------|
| MRILG | 0.25 | -0.2  | 1024 | 0.60   | 0.01   | 0.85   | 5610  |
|       |      |       |      | (0.08) | (0.00) | (0.00) | (138) |
| MRILG | 0.25 | -0.05 | 16   | 0.13   | 0.00   | 0.85   | 6161  |
|       |      |       |      | (0.08) | (0.00) | (0.01) | (210) |
| MRILG | 0.25 | -0.05 | 64   | 0.25   | 0.00   | 0.85   | 6057  |
|       |      |       |      | (0.13) | (0.00) | (0.02) | (256) |
| MRILG | 0.25 | -0.05 | 256  | 0.41   | 0.00   | 0.85   | 5781  |
|       |      |       |      | (0.12) | (0.00) | (0.00) | (153) |
| MRILG | 0.25 | -0.05 | 1024 | 0.60   | 0.00   | 0.85   | 5644  |
|       |      |       |      | (0.13) | (0.00) | (0.00) | (115) |
| MRILG | 0.5  | -0.5  | 16   | 0.14   | 0.00   | 0.85   | 6146  |
|       |      |       |      | (0.05) | (0.00) | (0.00) | (75)  |
| MRILG | 0.5  | -0.5  | 64   | 0.29   | 0.00   | 0.85   | 5909  |
|       |      |       |      | (0.08) | (0.00) | (0.00) | (125) |
| MRILG | 0.5  | -0.5  | 256  | 0.43   | 0.00   | 0.85   | 5765  |
|       |      |       |      | (0.11) | (0.00) | (0.00) | (142) |
| MRILG | 0.5  | -0.5  | 1024 | 0.59   | 0.00   | 0.85   | 5686  |
|       |      |       |      | (0.09) | (0.00) | (0.00) | (121) |
| MRILG | 0.5  | -0.2  | 16   | 0.13   | 0.00   | 0.85   | 6134  |
|       |      |       |      | (0.07) | (0.00) | (0.00) | (97)  |
| MRILG | 0.5  | -0.2  | 64   | 0.23   | 0.00   | 0.85   | 6037  |
|       |      |       |      | (0.11) | (0.00) | (0.02) | (272) |
| MRILG | 0.5  | -0.2  | 256  | 0.49   | 0.00   | 0.85   | 5691  |
|       |      |       |      | (0.09) | (0.00) | (0.00) | (100) |
| MRILG | 0.5  | -0.2  | 1024 | 0.58   | 0.00   | 0.85   | 5644  |
|       |      |       |      | (0.12) | (0.00) | (0.00) | (121) |
| MRILG | 0.5  | -0.05 | 16   | 0.10   | 0.00   | 0.84   | 6253  |
|       |      |       |      | (0.08) | (0.00) | (0.02) | (247) |
| MRILG | 0.5  | -0.05 | 64   | 0.21   | 0.00   | 0.85   | 6059  |
|       |      |       |      | (0.11) | (0.00) | (0.01) | (261) |
| MRILG | 0.5  | -0.05 | 256  | 0.35   | 0.00   | 0.85   | 5924  |
|       |      |       |      | (0.17) | (0.00) | (0.02) | (297) |
| MRILG | 0.5  | -0.05 | 1024 | 0.28   | 0.00   | 0.83   | 6182  |
|       |      |       |      | (0.32) | (0.00) | (0.02) | (466) |
| MRILG | 0.75 | -0.5  | 16   | 0.09   | 0.00   | 0.85   | 6241  |
|       |      |       |      | (0.01) | (0.00) | (0.00) | (42)  |
| MRILG | 0.75 | -0.5  | 64   | 0.24   | 0.00   | 0.85   | 6002  |
|       |      |       |      | (0.07) | (0.00) | (0.00) | (117) |
| MRILG | 0.75 | -0.5  | 256  | 0.36   | 0.00   | 0.85   | 5746  |
|       |      |       |      | (0.10) | (0.00) | (0.00) | (146) |
| MRILG | 0.75 | -0.5  | 1024 | 0.57   | 0.00   | 0.85   | 5652  |
|       |      |       |      | (0.09) | (0.00) | (0.00) | (89)  |
| MRILG | 0.75 | -0.2  | 16   | 0.07   | 0.00   | 0.84   | 6288  |
|       |      |       |      | (0.07) | (0.00) | (0.02) | (221) |
| MRILG | 0.75 | -0.2  | 64   | 0.20   | 0.00   | 0.85   | 5943  |
|       |      |       |      | (0.07) | (0.00) | (0.00) | (175) |
| MRILG | 0.75 | -0.2  | 256  | 0.37   | 0.00   | 0.85   | 5784  |
|       |      |       |      | (0.09) | (0.00) | (0.00) | (148) |
| MRILG | 0.75 | -0.2  | 1024 | 0.51   | 0.00   | 0.85   | 5824  |
|       |      |       |      | (0.20) | (0.00) | (0.02) | (334) |
| MRILG | 0.75 | -0.05 | 16   | 0.06   | 0.00   | 0.83   | 6366  |
|       |      |       |      | (0.07) | (0.00) | (0.02) | (320) |
| MRILG | 0.75 | -0.05 | 64   | 0.22   | 0.00   | 0.84   | 6072  |
|       |      |       |      | (0.12) | (0.00) | (0.02) | (328) |
| MRILG | 0.75 | -0.05 | 256  | 0.31   | 0.00   | 0.84   | 6003  |
|       |      |       |      | (0.19) | (0.00) | (0.02) | (374) |
| MRILG | 0.75 | -0.05 | 1024 | 0.30   | 0.00   | 0.83   | 6083  |
|       |      |       |      | (0.29) | (0.00) | (0.02) | (474) |

Table 33: Test accuracy, with SD, of every ETL task trained, using the ImageNet dataset and over 10 seeds. We fix the noise during ETL’s train and test phase at 0.25.

| Game    | $\lambda$ | $\nu$ | $ \mathcal{C} $ | Discrimination | Classification |
|---------|-----------|-------|-----------------|----------------|----------------|
| LG (SS) | 0         | 0     | 16              | 0.13<br>(0.02) | 0.06<br>(0.01) |
| LG (SS) | 0         | 0     | 64              | 0.19<br>(0.04) | 0.08<br>(0.01) |
| LG (SS) | 0         | 0     | 256             | 0.24<br>(0.04) | 0.09<br>(0.01) |
| LG (SS) | 0         | 0     | 1024            | 0.36<br>(0.05) | 0.10<br>(0.01) |
| LG (RL) | 0         | 0     | 16              | 0.23<br>(0.03) | 0.06<br>(0.01) |
| LG (RL) | 0         | 0     | 64              | 0.43<br>(0.05) | 0.08<br>(0.01) |
| LG (RL) | 0         | 0     | 256             | 0.59<br>(0.03) | 0.10<br>(0.01) |
| LG (RL) | 0         | 0     | 1024            | 0.67<br>(0.02) | 0.11<br>(0.01) |
| NLG     | 0.25      | 0     | 16              | 0.26<br>(0.05) | 0.06<br>(0.01) |
| NLG     | 0.25      | 0     | 64              | 0.47<br>(0.03) | 0.09<br>(0.00) |
| NLG     | 0.25      | 0     | 256             | 0.64<br>(0.03) | 0.11<br>(0.01) |
| NLG     | 0.25      | 0     | 1024            | 0.69<br>(0.03) | 0.11<br>(0.01) |
| MRILG   | 0.25      | -0.5  | 16              | 0.23<br>(0.04) | 0.05<br>(0.01) |
| MRILG   | 0.25      | -0.5  | 64              | 0.47<br>(0.04) | 0.09<br>(0.01) |
| MRILG   | 0.25      | -0.5  | 256             | 0.61<br>(0.04) | 0.10<br>(0.01) |
| MRILG   | 0.25      | -0.5  | 1024            | 0.70<br>(0.04) | 0.11<br>(0.01) |
| MRILG   | 0.25      | -0.2  | 16              | 0.23<br>(0.08) | 0.06<br>(0.02) |
| MRILG   | 0.25      | -0.2  | 64              | 0.37<br>(0.20) | 0.07<br>(0.04) |
| MRILG   | 0.25      | -0.2  | 256             | 0.56<br>(0.20) | 0.09<br>(0.03) |
| MRILG   | 0.25      | -0.2  | 1024            | 0.69<br>(0.03) | 0.11<br>(0.01) |
| MRILG   | 0.25      | -0.05 | 16              | 0.13<br>(0.11) | 0.04<br>(0.02) |
| MRILG   | 0.25      | -0.05 | 64              | 0.36<br>(0.16) | 0.07<br>(0.03) |
| MRILG   | 0.25      | -0.05 | 256             | 0.60<br>(0.05) | 0.10<br>(0.01) |
| MRILG   | 0.25      | -0.05 | 1024            | 0.67<br>(0.05) | 0.10<br>(0.01) |

Table 34: Test accuracy, with SD, of every ETL task trained, using the CelebA dataset and over 10 seeds. We fix the noise during ETL’s train and test phase at 0.25.

| Game    | $\lambda$ | $\nu$ | $ \mathbb{C} $ | Discrimination | Classification | Attribute      | Reconstruction |
|---------|-----------|-------|----------------|----------------|----------------|----------------|----------------|
| LG (SS) | 0         | 0     | 16             | 0.11<br>(0.02) | 0.00<br>(0.00) | 0.85<br>(0.00) | 6177<br>(67)   |
| LG (SS) | 0         | 0     | 64             | 0.19<br>(0.02) | 0.00<br>(0.00) | 0.85<br>(0.00) | 6055<br>(60)   |
| LG (SS) | 0         | 0     | 256            | 0.25<br>(0.05) | 0.00<br>(0.00) | 0.85<br>(0.00) | 5955<br>(116)  |
| LG (SS) | 0         | 0     | 1024           | 0.28<br>(0.05) | 0.00<br>(0.00) | 0.85<br>(0.00) | 5932<br>(67)   |
| LG (RL) | 0         | 0     | 16             | 0.11<br>(0.04) | 0.00<br>(0.00) | 0.85<br>(0.00) | 6145<br>(65)   |
| LG (RL) | 0         | 0     | 64             | 0.24<br>(0.05) | 0.00<br>(0.00) | 0.85<br>(0.00) | 5973<br>(162)  |
| LG (RL) | 0         | 0     | 256            | 0.34<br>(0.07) | 0.00<br>(0.00) | 0.85<br>(0.00) | 5769<br>(144)  |
| LG (RL) | 0         | 0     | 1024           | 0.47<br>(0.06) | 0.00<br>(0.00) | 0.85<br>(0.00) | 5734<br>(178)  |
| NLG     | 0.25      | 0     | 16             | 0.12<br>(0.05) | 0.00<br>(0.00) | 0.85<br>(0.00) | 6146<br>(89)   |
| NLG     | 0.25      | 0     | 64             | 0.21<br>(0.06) | 0.00<br>(0.00) | 0.85<br>(0.00) | 6026<br>(142)  |
| NLG     | 0.25      | 0     | 256            | 0.37<br>(0.08) | 0.00<br>(0.00) | 0.85<br>(0.00) | 5793<br>(141)  |
| NLG     | 0.25      | 0     | 1024           | 0.49<br>(0.08) | 0.00<br>(0.00) | 0.85<br>(0.00) | 5738<br>(76)   |
| MRILG   | 0.25      | -0.5  | 16             | 0.11<br>(0.03) | 0.00<br>(0.00) | 0.85<br>(0.00) | 6137<br>(118)  |
| MRILG   | 0.25      | -0.5  | 64             | 0.23<br>(0.04) | 0.00<br>(0.00) | 0.85<br>(0.00) | 5974<br>(98)   |
| MRILG   | 0.25      | -0.5  | 256            | 0.36<br>(0.09) | 0.00<br>(0.00) | 0.85<br>(0.00) | 5774<br>(97)   |
| MRILG   | 0.25      | -0.5  | 1024           | 0.51<br>(0.08) | 0.01<br>(0.00) | 0.85<br>(0.00) | 5675<br>(100)  |
| MRILG   | 0.25      | -0.2  | 16             | 0.11<br>(0.04) | 0.00<br>(0.00) | 0.85<br>(0.00) | 6164<br>(60)   |
| MRILG   | 0.25      | -0.2  | 64             | 0.20<br>(0.10) | 0.00<br>(0.00) | 0.85<br>(0.01) | 6023<br>(277)  |
| MRILG   | 0.25      | -0.2  | 256            | 0.32<br>(0.14) | 0.00<br>(0.00) | 0.85<br>(0.02) | 5910<br>(314)  |
| MRILG   | 0.25      | -0.2  | 1024           | 0.48<br>(0.07) | 0.00<br>(0.00) | 0.85<br>(0.00) | 5663<br>(123)  |
| MRILG   | 0.25      | -0.05 | 16             | 0.10<br>(0.06) | 0.00<br>(0.00) | 0.85<br>(0.01) | 6177<br>(203)  |
| MRILG   | 0.25      | -0.05 | 64             | 0.20<br>(0.10) | 0.00<br>(0.00) | 0.85<br>(0.02) | 6085<br>(245)  |
| MRILG   | 0.25      | -0.05 | 256            | 0.33<br>(0.08) | 0.00<br>(0.00) | 0.85<br>(0.00) | 5818<br>(138)  |
| MRILG   | 0.25      | -0.05 | 1024           | 0.49<br>(0.10) | 0.00<br>(0.00) | 0.85<br>(0.00) | 5695<br>(102)  |

Table 35: Test accuracy, with SD, of every ETL task trained, using the ImageNet dataset and over 10 seeds. We fix the noise during ETL’s train and test phase at 0.5.

| Game    | $\lambda$ | $\nu$ | $ \mathbb{C} $ | Discrimination | Classification |
|---------|-----------|-------|----------------|----------------|----------------|
| LG (SS) | 0         | 0     | 16             | 0.06<br>(0.01) | 0.04<br>(0.00) |
| LG (SS) | 0         | 0     | 64             | 0.09<br>(0.02) | 0.05<br>(0.01) |
| LG (SS) | 0         | 0     | 256            | 0.10<br>(0.03) | 0.05<br>(0.01) |
| LG (SS) | 0         | 0     | 1024           | 0.16<br>(0.03) | 0.06<br>(0.01) |
| LG (RL) | 0         | 0     | 16             | 0.11<br>(0.01) | 0.04<br>(0.00) |
| LG (RL) | 0         | 0     | 64             | 0.22<br>(0.03) | 0.06<br>(0.01) |
| LG (RL) | 0         | 0     | 256            | 0.31<br>(0.02) | 0.06<br>(0.00) |
| LG (RL) | 0         | 0     | 1024           | 0.36<br>(0.02) | 0.07<br>(0.00) |
| NLG     | 0.5       | 0     | 16             | 0.13<br>(0.02) | 0.04<br>(0.00) |
| NLG     | 0.5       | 0     | 64             | 0.23<br>(0.02) | 0.06<br>(0.01) |
| NLG     | 0.5       | 0     | 256            | 0.35<br>(0.02) | 0.08<br>(0.00) |
| NLG     | 0.5       | 0     | 1024           | 0.41<br>(0.02) | 0.08<br>(0.01) |
| MRILG   | 0.5       | -0.5  | 16             | 0.13<br>(0.02) | 0.04<br>(0.01) |
| MRILG   | 0.5       | -0.5  | 64             | 0.26<br>(0.02) | 0.06<br>(0.01) |
| MRILG   | 0.5       | -0.5  | 256            | 0.37<br>(0.02) | 0.08<br>(0.00) |
| MRILG   | 0.5       | -0.5  | 1024           | 0.40<br>(0.02) | 0.07<br>(0.01) |
| MRILG   | 0.5       | -0.2  | 16             | 0.11<br>(0.06) | 0.03<br>(0.02) |
| MRILG   | 0.5       | -0.2  | 64             | 0.21<br>(0.08) | 0.05<br>(0.02) |
| MRILG   | 0.5       | -0.2  | 256            | 0.35<br>(0.03) | 0.07<br>(0.01) |
| MRILG   | 0.5       | -0.2  | 1024           | 0.41<br>(0.01) | 0.07<br>(0.01) |
| MRILG   | 0.5       | -0.05 | 16             | 0.07<br>(0.05) | 0.03<br>(0.02) |
| MRILG   | 0.5       | -0.05 | 64             | 0.17<br>(0.09) | 0.04<br>(0.02) |
| MRILG   | 0.5       | -0.05 | 256            | 0.28<br>(0.15) | 0.06<br>(0.03) |
| MRILG   | 0.5       | -0.05 | 1024           | 0.31<br>(0.16) | 0.05<br>(0.03) |

Table 36: Test accuracy, with SD, of every ETL task trained, using the CelebA dataset and over 10 seeds. We fix the noise during ETL’s train and test phase at 0.5.

| Game    | $\lambda$ | $\nu$ | $ \mathbb{C} $ | Discrimination | Classification | Attribute      | Reconstruction |
|---------|-----------|-------|----------------|----------------|----------------|----------------|----------------|
| LG (SS) | 0         | 0     | 16             | 0.05<br>(0.01) | 0.00<br>(0.00) | 0.84<br>(0.00) | 6291<br>(53)   |
| LG (SS) | 0         | 0     | 64             | 0.09<br>(0.01) | 0.00<br>(0.00) | 0.85<br>(0.00) | 6184<br>(48)   |
| LG (SS) | 0         | 0     | 256            | 0.12<br>(0.03) | 0.00<br>(0.00) | 0.85<br>(0.00) | 6107<br>(104)  |
| LG (SS) | 0         | 0     | 1024           | 0.13<br>(0.03) | 0.00<br>(0.00) | 0.84<br>(0.00) | 6102<br>(73)   |
| LG (RL) | 0         | 0     | 16             | 0.06<br>(0.02) | 0.00<br>(0.00) | 0.85<br>(0.00) | 6210<br>(53)   |
| LG (RL) | 0         | 0     | 64             | 0.13<br>(0.03) | 0.00<br>(0.00) | 0.85<br>(0.00) | 6061<br>(140)  |
| LG (RL) | 0         | 0     | 256            | 0.19<br>(0.03) | 0.00<br>(0.00) | 0.85<br>(0.00) | 5896<br>(117)  |
| LG (RL) | 0         | 0     | 1024           | 0.26<br>(0.03) | 0.00<br>(0.00) | 0.85<br>(0.00) | 5871<br>(155)  |
| NLG     | 0.5       | 0     | 16             | 0.06<br>(0.02) | 0.00<br>(0.00) | 0.85<br>(0.00) | 6196<br>(73)   |
| NLG     | 0.5       | 0     | 64             | 0.11<br>(0.04) | 0.00<br>(0.00) | 0.85<br>(0.00) | 6096<br>(110)  |
| NLG     | 0.5       | 0     | 256            | 0.20<br>(0.04) | 0.00<br>(0.00) | 0.85<br>(0.00) | 5968<br>(160)  |
| NLG     | 0.5       | 0     | 1024           | 0.31<br>(0.04) | 0.00<br>(0.00) | 0.85<br>(0.00) | 5833<br>(103)  |
| MRILG   | 0.5       | -0.5  | 16             | 0.07<br>(0.02) | 0.00<br>(0.00) | 0.85<br>(0.00) | 6203<br>(58)   |
| MRILG   | 0.5       | -0.5  | 64             | 0.14<br>(0.03) | 0.00<br>(0.00) | 0.85<br>(0.00) | 6009<br>(109)  |
| MRILG   | 0.5       | -0.5  | 256            | 0.22<br>(0.04) | 0.00<br>(0.00) | 0.85<br>(0.00) | 5899<br>(120)  |
| MRILG   | 0.5       | -0.5  | 1024           | 0.30<br>(0.04) | 0.00<br>(0.00) | 0.85<br>(0.00) | 5860<br>(95)   |
| MRILG   | 0.5       | -0.2  | 16             | 0.07<br>(0.03) | 0.00<br>(0.00) | 0.85<br>(0.00) | 6203<br>(76)   |
| MRILG   | 0.5       | -0.2  | 64             | 0.12<br>(0.05) | 0.00<br>(0.00) | 0.85<br>(0.01) | 6116<br>(234)  |
| MRILG   | 0.5       | -0.2  | 256            | 0.25<br>(0.04) | 0.00<br>(0.00) | 0.85<br>(0.00) | 5844<br>(85)   |
| MRILG   | 0.5       | -0.2  | 1024           | 0.30<br>(0.06) | 0.00<br>(0.00) | 0.85<br>(0.00) | 5820<br>(92)   |
| MRILG   | 0.5       | -0.05 | 16             | 0.05<br>(0.03) | 0.00<br>(0.00) | 0.84<br>(0.02) | 6307<br>(212)  |
| MRILG   | 0.5       | -0.05 | 64             | 0.10<br>(0.05) | 0.00<br>(0.00) | 0.84<br>(0.01) | 6140<br>(221)  |
| MRILG   | 0.5       | -0.05 | 256            | 0.18<br>(0.08) | 0.00<br>(0.00) | 0.84<br>(0.01) | 6033<br>(257)  |
| MRILG   | 0.5       | -0.05 | 1024           | 0.14<br>(0.15) | 0.00<br>(0.00) | 0.83<br>(0.02) | 6275<br>(374)  |

Table 37: Test accuracy, with SD, of every ETL task trained, using the ImageNet dataset and over 10 seeds. We fix the noise during ETL’s train and test phase at 0.75.

| Game    | $\lambda$ | $\nu$ | $ \mathcal{C} $ | Discrimination | Classification |
|---------|-----------|-------|-----------------|----------------|----------------|
| LG (SS) | 0         | 0     | 16              | 0.02<br>(0.00) | 0.02<br>(0.00) |
| LG (SS) | 0         | 0     | 64              | 0.02<br>(0.01) | 0.02<br>(0.00) |
| LG (SS) | 0         | 0     | 256             | 0.02<br>(0.01) | 0.02<br>(0.00) |
| LG (SS) | 0         | 0     | 1024            | 0.04<br>(0.01) | 0.03<br>(0.00) |
| LG (RL) | 0         | 0     | 16              | 0.03<br>(0.00) | 0.02<br>(0.00) |
| LG (RL) | 0         | 0     | 64              | 0.06<br>(0.01) | 0.03<br>(0.00) |
| LG (RL) | 0         | 0     | 256             | 0.08<br>(0.01) | 0.03<br>(0.00) |
| LG (RL) | 0         | 0     | 1024            | 0.09<br>(0.01) | 0.03<br>(0.00) |
| NLG     | 0.75      | 0     | 16              | 0.04<br>(0.00) | 0.02<br>(0.00) |
| NLG     | 0.75      | 0     | 64              | 0.06<br>(0.00) | 0.03<br>(0.00) |
| NLG     | 0.75      | 0     | 256             | 0.09<br>(0.01) | 0.04<br>(0.00) |
| NLG     | 0.75      | 0     | 1024            | 0.11<br>(0.00) | 0.04<br>(0.00) |
| MRILG   | 0.75      | -0.5  | 16              | 0.04<br>(0.00) | 0.02<br>(0.00) |
| MRILG   | 0.75      | -0.5  | 64              | 0.07<br>(0.01) | 0.03<br>(0.00) |
| MRILG   | 0.75      | -0.5  | 256             | 0.10<br>(0.00) | 0.04<br>(0.00) |
| MRILG   | 0.75      | -0.5  | 1024            | 0.11<br>(0.01) | 0.04<br>(0.00) |
| MRILG   | 0.75      | -0.2  | 16              | 0.04<br>(0.00) | 0.02<br>(0.00) |
| MRILG   | 0.75      | -0.2  | 64              | 0.06<br>(0.02) | 0.03<br>(0.01) |
| MRILG   | 0.75      | -0.2  | 256             | 0.08<br>(0.04) | 0.03<br>(0.01) |
| MRILG   | 0.75      | -0.2  | 1024            | 0.11<br>(0.01) | 0.04<br>(0.00) |
| MRILG   | 0.75      | -0.05 | 16              | 0.02<br>(0.02) | 0.01<br>(0.01) |
| MRILG   | 0.75      | -0.05 | 64              | 0.04<br>(0.03) | 0.02<br>(0.01) |
| MRILG   | 0.75      | -0.05 | 256             | 0.10<br>(0.01) | 0.04<br>(0.00) |
| MRILG   | 0.75      | -0.05 | 1024            | 0.07<br>(0.05) | 0.02<br>(0.02) |



Table 38: Test accuracy, with SD, of every ETL task trained, using the CelebA dataset and over 10 seeds. We fix the noise during ETL’s train and test phase at 0.75.

| Game    | $\lambda$ | $\nu$ | $ \mathbb{C} $ | Discrimination | Classification | Attribute      | Reconstruction |
|---------|-----------|-------|----------------|----------------|----------------|----------------|----------------|
| LG (SS) | 0         | 0     | 16             | 0.01<br>(0.00) | 0.00<br>(0.00) | 0.83<br>(0.00) | 6438<br>(31)   |
| LG (SS) | 0         | 0     | 64             | 0.02<br>(0.00) | 0.00<br>(0.00) | 0.83<br>(0.00) | 6357<br>(33)   |
| LG (SS) | 0         | 0     | 256            | 0.03<br>(0.01) | 0.00<br>(0.00) | 0.83<br>(0.00) | 6311<br>(68)   |
| LG (SS) | 0         | 0     | 1024           | 0.03<br>(0.01) | 0.00<br>(0.00) | 0.83<br>(0.00) | 6316<br>(59)   |
| LG (RL) | 0         | 0     | 16             | 0.02<br>(0.00) | 0.00<br>(0.00) | 0.84<br>(0.00) | 6331<br>(31)   |
| LG (RL) | 0         | 0     | 64             | 0.04<br>(0.01) | 0.00<br>(0.00) | 0.84<br>(0.00) | 6232<br>(104)  |
| LG (RL) | 0         | 0     | 256            | 0.05<br>(0.01) | 0.00<br>(0.00) | 0.84<br>(0.00) | 6122<br>(75)   |
| LG (RL) | 0         | 0     | 1024           | 0.07<br>(0.01) | 0.00<br>(0.00) | 0.84<br>(0.00) | 6108<br>(110)  |
| NLG     | 0.75      | 0     | 16             | 0.02<br>(0.01) | 0.00<br>(0.00) | 0.84<br>(0.00) | 6291<br>(59)   |
| NLG     | 0.75      | 0     | 64             | 0.04<br>(0.01) | 0.00<br>(0.00) | 0.84<br>(0.00) | 6183<br>(64)   |
| NLG     | 0.75      | 0     | 256            | 0.07<br>(0.01) | 0.00<br>(0.00) | 0.84<br>(0.00) | 6128<br>(88)   |
| NLG     | 0.75      | 0     | 1024           | 0.10<br>(0.01) | 0.00<br>(0.00) | 0.84<br>(0.00) | 6101<br>(65)   |
| MRILG   | 0.75      | -0.5  | 16             | 0.02<br>(0.00) | 0.00<br>(0.00) | 0.84<br>(0.00) | 6345<br>(33)   |
| MRILG   | 0.75      | -0.5  | 64             | 0.05<br>(0.01) | 0.00<br>(0.00) | 0.84<br>(0.00) | 6210<br>(75)   |
| MRILG   | 0.75      | -0.5  | 256            | 0.07<br>(0.01) | 0.00<br>(0.00) | 0.84<br>(0.00) | 6078<br>(103)  |
| MRILG   | 0.75      | -0.5  | 1024           | 0.09<br>(0.01) | 0.00<br>(0.00) | 0.84<br>(0.00) | 6069<br>(53)   |
| MRILG   | 0.75      | -0.2  | 16             | 0.02<br>(0.01) | 0.00<br>(0.00) | 0.83<br>(0.02) | 6391<br>(157)  |
| MRILG   | 0.75      | -0.2  | 64             | 0.04<br>(0.01) | 0.00<br>(0.00) | 0.84<br>(0.00) | 6158<br>(122)  |
| MRILG   | 0.75      | -0.2  | 256            | 0.07<br>(0.01) | 0.00<br>(0.00) | 0.84<br>(0.00) | 6103<br>(94)   |
| MRILG   | 0.75      | -0.2  | 1024           | 0.08<br>(0.03) | 0.00<br>(0.00) | 0.83<br>(0.01) | 6184<br>(189)  |
| MRILG   | 0.75      | -0.05 | 16             | 0.01<br>(0.01) | 0.00<br>(0.00) | 0.82<br>(0.02) | 6458<br>(223)  |
| MRILG   | 0.75      | -0.05 | 64             | 0.04<br>(0.02) | 0.00<br>(0.00) | 0.83<br>(0.02) | 6291<br>(212)  |
| MRILG   | 0.75      | -0.05 | 256            | 0.06<br>(0.03) | 0.00<br>(0.00) | 0.83<br>(0.01) | 6252<br>(233)  |
| MRILG   | 0.75      | -0.05 | 1024           | 0.05<br>(0.04) | 0.00<br>(0.00) | 0.82<br>(0.01) | 6311<br>(284)  |

Table 39: Test accuracy with SD for different game variants, using ImageNet dataset and over 10 seeds. During test  $\lambda_{\text{test}}$  is set to 0.

| Game    | $\lambda$ | $\nu$ | $ \mathbb{C} $ | $ \mathbb{C} $ (test) |                |
|---------|-----------|-------|----------------|-----------------------|----------------|
|         |           |       |                | 1024                  | 4096           |
| LG (SS) | 0         | 0     | 16             | 0.61<br>(0.04)        | 0.35<br>(0.04) |
| LG (SS) | 0         | 0     | 64             | 0.76<br>(0.06)        | 0.52<br>(0.08) |
| LG (SS) | 0         | 0     | 256            | 0.88<br>(0.03)        | 0.71<br>(0.06) |
| LG (SS) | 0         | 0     | 1024           | 0.96<br>(0.02)        | 0.88<br>(0.04) |
| LG (RL) | 0         | 0     | 16             | 0.67<br>(0.04)        | 0.39<br>(0.04) |
| LG (RL) | 0         | 0     | 64             | 0.93<br>(0.01)        | 0.79<br>(0.03) |
| LG (RL) | 0         | 0     | 256            | 0.98<br>(0.00)        | 0.94<br>(0.01) |
| LG (RL) | 0         | 0     | 1024           | 0.99<br>(0.00)        | 0.97<br>(0.00) |
| NLG     | 0.25      | 0     | 16             | 0.64<br>(0.05)        | 0.36<br>(0.06) |
| NLG     | 0.25      | 0     | 64             | 0.92<br>(0.01)        | 0.77<br>(0.01) |
| NLG     | 0.25      | 0     | 256            | 0.98<br>(0.00)        | 0.94<br>(0.01) |
| NLG     | 0.25      | 0     | 1024           | 0.99<br>(0.00)        | 0.97<br>(0.00) |
| NLG     | 0.5       | 0     | 16             | 0.55<br>(0.03)        | 0.27<br>(0.02) |
| NLG     | 0.5       | 0     | 64             | 0.87<br>(0.01)        | 0.67<br>(0.03) |
| NLG     | 0.5       | 0     | 256            | 0.98<br>(0.00)        | 0.91<br>(0.01) |
| NLG     | 0.5       | 0     | 1024           | 0.99<br>(0.00)        | 0.97<br>(0.00) |
| NLG     | 0.75      | 0     | 16             | 0.34<br>(0.04)        | 0.14<br>(0.02) |
| NLG     | 0.75      | 0     | 64             | 0.75<br>(0.02)        | 0.48<br>(0.03) |
| NLG     | 0.75      | 0     | 256            | 0.94<br>(0.01)        | 0.81<br>(0.02) |
| NLG     | 0.75      | 0     | 1024           | 0.98<br>(0.00)        | 0.94<br>(0.01) |
| MRILG   | 0.25      | -0.5  | 16             | 0.62<br>(0.05)        | 0.34<br>(0.05) |
| MRILG   | 0.25      | -0.5  | 64             | 0.92<br>(0.01)        | 0.77<br>(0.03) |
| MRILG   | 0.25      | -0.5  | 256            | 0.98<br>(0.00)        | 0.94<br>(0.01) |
| MRILG   | 0.25      | -0.5  | 1024           | 0.99<br>(0.00)        | 0.97<br>(0.00) |
| MRILG   | 0.25      | -0.2  | 16             | 0.58<br>(0.20)        | 0.33<br>(0.12) |
| MRILG   | 0.25      | -0.2  | 64             | 0.74<br>(0.39)        | 0.62<br>(0.33) |
| MRILG   | 0.25      | -0.2  | 256            | 0.88<br>(0.31)        | 0.84<br>(0.30) |

Table 39: Continued from previous page.

|       |      |       |      |        |        |
|-------|------|-------|------|--------|--------|
| MRILG | 0.25 | -0.2  | 1024 | 0.99   | 0.97   |
|       |      |       |      | (0.00) | (0.00) |
| MRILG | 0.25 | -0.05 | 16   | 0.38   | 0.18   |
|       |      |       |      | (0.25) | (0.14) |
| MRILG | 0.25 | -0.05 | 64   | 0.81   | 0.66   |
|       |      |       |      | (0.29) | (0.24) |
| MRILG | 0.25 | -0.05 | 256  | 0.98   | 0.93   |
|       |      |       |      | (0.00) | (0.01) |
| MRILG | 0.25 | -0.05 | 1024 | 0.99   | 0.96   |
|       |      |       |      | (0.00) | (0.01) |
| MRILG | 0.5  | -0.5  | 16   | 0.56   | 0.29   |
|       |      |       |      | (0.04) | (0.04) |
| MRILG | 0.5  | -0.5  | 64   | 0.90   | 0.72   |
|       |      |       |      | (0.01) | (0.03) |
| MRILG | 0.5  | -0.5  | 256  | 0.98   | 0.92   |
|       |      |       |      | (0.00) | (0.01) |
| MRILG | 0.5  | -0.5  | 1024 | 0.99   | 0.96   |
|       |      |       |      | (0.00) | (0.00) |
| MRILG | 0.5  | -0.2  | 16   | 0.44   | 0.22   |
|       |      |       |      | (0.23) | (0.12) |
| MRILG | 0.5  | -0.2  | 64   | 0.79   | 0.61   |
|       |      |       |      | (0.28) | (0.22) |
| MRILG | 0.5  | -0.2  | 256  | 0.97   | 0.90   |
|       |      |       |      | (0.01) | (0.02) |
| MRILG | 0.5  | -0.2  | 1024 | 0.99   | 0.97   |
|       |      |       |      | (0.00) | (0.00) |
| MRILG | 0.5  | -0.05 | 16   | 0.31   | 0.14   |
|       |      |       |      | (0.22) | (0.10) |
| MRILG | 0.5  | -0.05 | 64   | 0.69   | 0.51   |
|       |      |       |      | (0.36) | (0.27) |
| MRILG | 0.5  | -0.05 | 256  | 0.78   | 0.72   |
|       |      |       |      | (0.41) | (0.38) |
| MRILG | 0.5  | -0.05 | 1024 | 0.79   | 0.77   |
|       |      |       |      | (0.42) | (0.41) |
| MRILG | 0.75 | -0.5  | 16   | 0.38   | 0.16   |
|       |      |       |      | (0.05) | (0.03) |
| MRILG | 0.75 | -0.5  | 64   | 0.78   | 0.52   |
|       |      |       |      | (0.02) | (0.04) |
| MRILG | 0.75 | -0.5  | 256  | 0.94   | 0.82   |
|       |      |       |      | (0.01) | (0.02) |
| MRILG | 0.75 | -0.5  | 1024 | 0.98   | 0.93   |
|       |      |       |      | (0.01) | (0.02) |
| MRILG | 0.75 | -0.2  | 16   | 0.39   | 0.16   |
|       |      |       |      | (0.03) | (0.02) |
| MRILG | 0.75 | -0.2  | 64   | 0.70   | 0.47   |
|       |      |       |      | (0.25) | (0.17) |
| MRILG | 0.75 | -0.2  | 256  | 0.76   | 0.67   |
|       |      |       |      | (0.40) | (0.35) |
| MRILG | 0.75 | -0.2  | 1024 | 0.98   | 0.94   |
|       |      |       |      | (0.00) | (0.01) |
| MRILG | 0.75 | -0.05 | 16   | 0.19   | 0.08   |
|       |      |       |      | (0.18) | (0.08) |
| MRILG | 0.75 | -0.05 | 64   | 0.46   | 0.30   |
|       |      |       |      | (0.39) | (0.26) |
| MRILG | 0.75 | -0.05 | 256  | 0.95   | 0.84   |
|       |      |       |      | (0.01) | (0.02) |
| MRILG | 0.75 | -0.05 | 1024 | 0.62   | 0.59   |
|       |      |       |      | (0.46) | (0.44) |

Table 40: Test accuracy with SD for different game variants, using CelebA dataset and over 10 seeds. During test  $\lambda_{\text{test}}$  is set to 0.

| Game    | $\lambda$ | $\nu$ | $ \mathbb{C} $ | $ \mathbb{C} $ (test) |                |
|---------|-----------|-------|----------------|-----------------------|----------------|
|         |           |       |                | 1024                  | 4096           |
| LG (SS) | 0         | 0     | 16             | 0.56<br>(0.07)        | 0.29<br>(0.06) |
| LG (SS) | 0         | 0     | 64             | 0.76<br>(0.03)        | 0.51<br>(0.03) |
| LG (SS) | 0         | 0     | 256            | 0.81<br>(0.03)        | 0.59<br>(0.05) |
| LG (SS) | 0         | 0     | 1024           | 0.75<br>(0.01)        | 0.53<br>(0.02) |
| LG (RL) | 0         | 0     | 16             | 0.58<br>(0.07)        | 0.28<br>(0.07) |
| LG (RL) | 0         | 0     | 64             | 0.88<br>(0.02)        | 0.65<br>(0.04) |
| LG (RL) | 0         | 0     | 256            | 0.95<br>(0.01)        | 0.82<br>(0.03) |
| LG (RL) | 0         | 0     | 1024           | 0.97<br>(0.00)        | 0.87<br>(0.01) |
| NLG     | 0.25      | 0     | 16             | 0.55<br>(0.07)        | 0.26<br>(0.06) |
| NLG     | 0.25      | 0     | 64             | 0.84<br>(0.04)        | 0.60<br>(0.07) |
| NLG     | 0.25      | 0     | 256            | 0.95<br>(0.01)        | 0.82<br>(0.03) |
| NLG     | 0.25      | 0     | 1024           | 0.97<br>(0.00)        | 0.88<br>(0.01) |
| NLG     | 0.5       | 0     | 16             | 0.47<br>(0.04)        | 0.20<br>(0.04) |
| NLG     | 0.5       | 0     | 64             | 0.78<br>(0.05)        | 0.49<br>(0.08) |
| NLG     | 0.5       | 0     | 256            | 0.93<br>(0.01)        | 0.77<br>(0.03) |
| NLG     | 0.5       | 0     | 1024           | 0.96<br>(0.00)        | 0.87<br>(0.01) |
| NLG     | 0.75      | 0     | 16             | 0.30<br>(0.07)        | 0.11<br>(0.04) |
| NLG     | 0.75      | 0     | 64             | 0.67<br>(0.06)        | 0.37<br>(0.06) |
| NLG     | 0.75      | 0     | 256            | 0.87<br>(0.03)        | 0.65<br>(0.05) |
| NLG     | 0.75      | 0     | 1024           | 0.95<br>(0.01)        | 0.83<br>(0.02) |
| MRILG   | 0.25      | -0.5  | 16             | 0.55<br>(0.05)        | 0.25<br>(0.05) |
| MRILG   | 0.25      | -0.5  | 64             | 0.86<br>(0.03)        | 0.62<br>(0.06) |
| MRILG   | 0.25      | -0.5  | 256            | 0.94<br>(0.01)        | 0.81<br>(0.03) |
| MRILG   | 0.25      | -0.5  | 1024           | 0.97<br>(0.00)        | 0.88<br>(0.01) |
| MRILG   | 0.25      | -0.2  | 16             | 0.54<br>(0.05)        | 0.24<br>(0.05) |
| MRILG   | 0.25      | -0.2  | 64             | 0.76<br>(0.27)        | 0.54<br>(0.21) |
| MRILG   | 0.25      | -0.2  | 256            | 0.85<br>(0.30)        | 0.73<br>(0.26) |

Table 40: Continued from previous page.

|       |      |       |      |        |        |
|-------|------|-------|------|--------|--------|
| MRILG | 0.25 | -0.2  | 1024 | 0.97   | 0.87   |
|       |      |       |      | (0.00) | (0.01) |
| MRILG | 0.25 | -0.05 | 16   | 0.47   | 0.21   |
|       |      |       |      | (0.19) | (0.10) |
| MRILG | 0.25 | -0.05 | 64   | 0.76   | 0.53   |
|       |      |       |      | (0.27) | (0.20) |
| MRILG | 0.25 | -0.05 | 256  | 0.94   | 0.80   |
|       |      |       |      | (0.01) | (0.03) |
| MRILG | 0.25 | -0.05 | 1024 | 0.96   | 0.87   |
|       |      |       |      | (0.01) | (0.02) |
| MRILG | 0.5  | -0.5  | 16   | 0.49   | 0.21   |
|       |      |       |      | (0.05) | (0.04) |
| MRILG | 0.5  | -0.5  | 64   | 0.82   | 0.56   |
|       |      |       |      | (0.04) | (0.06) |
| MRILG | 0.5  | -0.5  | 256  | 0.93   | 0.78   |
|       |      |       |      | (0.01) | (0.03) |
| MRILG | 0.5  | -0.5  | 1024 | 0.96   | 0.87   |
|       |      |       |      | (0.00) | (0.01) |
| MRILG | 0.5  | -0.2  | 16   | 0.46   | 0.20   |
|       |      |       |      | (0.10) | (0.07) |
| MRILG | 0.5  | -0.2  | 64   | 0.72   | 0.48   |
|       |      |       |      | (0.26) | (0.18) |
| MRILG | 0.5  | -0.2  | 256  | 0.94   | 0.79   |
|       |      |       |      | (0.01) | (0.03) |
| MRILG | 0.5  | -0.2  | 1024 | 0.96   | 0.86   |
|       |      |       |      | (0.01) | (0.02) |
| MRILG | 0.5  | -0.05 | 16   | 0.34   | 0.15   |
|       |      |       |      | (0.22) | (0.10) |
| MRILG | 0.5  | -0.05 | 64   | 0.68   | 0.42   |
|       |      |       |      | (0.24) | (0.16) |
| MRILG | 0.5  | -0.05 | 256  | 0.80   | 0.64   |
|       |      |       |      | (0.30) | (0.27) |
| MRILG | 0.5  | -0.05 | 1024 | 0.46   | 0.40   |
|       |      |       |      | (0.44) | (0.40) |
| MRILG | 0.75 | -0.5  | 16   | 0.32   | 0.11   |
|       |      |       |      | (0.02) | (0.01) |
| MRILG | 0.75 | -0.5  | 64   | 0.71   | 0.41   |
|       |      |       |      | (0.06) | (0.07) |
| MRILG | 0.75 | -0.5  | 256  | 0.88   | 0.66   |
|       |      |       |      | (0.02) | (0.05) |
| MRILG | 0.75 | -0.5  | 1024 | 0.94   | 0.81   |
|       |      |       |      | (0.01) | (0.03) |
| MRILG | 0.75 | -0.2  | 16   | 0.23   | 0.08   |
|       |      |       |      | (0.15) | (0.06) |
| MRILG | 0.75 | -0.2  | 64   | 0.65   | 0.35   |
|       |      |       |      | (0.07) | (0.07) |
| MRILG | 0.75 | -0.2  | 256  | 0.88   | 0.67   |
|       |      |       |      | (0.03) | (0.05) |
| MRILG | 0.75 | -0.2  | 1024 | 0.85   | 0.74   |
|       |      |       |      | (0.30) | (0.26) |
| MRILG | 0.75 | -0.05 | 16   | 0.17   | 0.06   |
|       |      |       |      | (0.19) | (0.07) |
| MRILG | 0.75 | -0.05 | 64   | 0.57   | 0.34   |
|       |      |       |      | (0.30) | (0.18) |
| MRILG | 0.75 | -0.05 | 256  | 0.71   | 0.55   |
|       |      |       |      | (0.38) | (0.30) |
| MRILG | 0.75 | -0.05 | 1024 | 0.53   | 0.45   |
|       |      |       |      | (0.46) | (0.40) |

Table 41: Test accuracy with SD for different game variants, using ImageNet dataset and over 10 seeds. During test  $\lambda_{\text{test}}$  is set to 0.25.

| Game    | $\lambda$ | $\nu$ | $ \mathbb{C} $ | $ \mathbb{C} $ (test) |                |
|---------|-----------|-------|----------------|-----------------------|----------------|
|         |           |       |                | 1024                  | 4096           |
| LG (SS) | 0         | 0     | 16             | 0.17<br>(0.03)        | 0.08<br>(0.02) |
| LG (SS) | 0         | 0     | 64             | 0.21<br>(0.03)        | 0.11<br>(0.02) |
| LG (SS) | 0         | 0     | 256            | 0.27<br>(0.05)        | 0.17<br>(0.03) |
| LG (SS) | 0         | 0     | 1024           | 0.30<br>(0.05)        | 0.20<br>(0.04) |
| LG (RL) | 0         | 0     | 16             | 0.20<br>(0.04)        | 0.10<br>(0.02) |
| LG (RL) | 0         | 0     | 64             | 0.38<br>(0.10)        | 0.24<br>(0.06) |
| LG (RL) | 0         | 0     | 256            | 0.46<br>(0.10)        | 0.33<br>(0.09) |
| LG (RL) | 0         | 0     | 1024           | 0.48<br>(0.06)        | 0.36<br>(0.05) |
| NLG     | 0.25      | 0     | 16             | 0.52<br>(0.04)        | 0.26<br>(0.04) |
| NLG     | 0.25      | 0     | 64             | 0.82<br>(0.01)        | 0.60<br>(0.02) |
| NLG     | 0.25      | 0     | 256            | 0.93<br>(0.01)        | 0.82<br>(0.02) |
| NLG     | 0.25      | 0     | 1024           | 0.97<br>(0.00)        | 0.90<br>(0.01) |
| MRILG   | 0.25      | -0.5  | 16             | 0.50<br>(0.04)        | 0.24<br>(0.03) |
| MRILG   | 0.25      | -0.5  | 64             | 0.81<br>(0.02)        | 0.60<br>(0.03) |
| MRILG   | 0.25      | -0.5  | 256            | 0.93<br>(0.01)        | 0.81<br>(0.02) |
| MRILG   | 0.25      | -0.5  | 1024           | 0.97<br>(0.01)        | 0.90<br>(0.02) |
| MRILG   | 0.25      | -0.2  | 16             | 0.47<br>(0.16)        | 0.24<br>(0.08) |
| MRILG   | 0.25      | -0.2  | 64             | 0.65<br>(0.34)        | 0.48<br>(0.26) |
| MRILG   | 0.25      | -0.2  | 256            | 0.84<br>(0.29)        | 0.73<br>(0.26) |
| MRILG   | 0.25      | -0.2  | 1024           | 0.96<br>(0.01)        | 0.89<br>(0.02) |
| MRILG   | 0.25      | -0.05 | 16             | 0.30<br>(0.20)        | 0.13<br>(0.10) |
| MRILG   | 0.25      | -0.05 | 64             | 0.71<br>(0.25)        | 0.51<br>(0.19) |
| MRILG   | 0.25      | -0.05 | 256            | 0.92<br>(0.02)        | 0.79<br>(0.03) |
| MRILG   | 0.25      | -0.05 | 1024           | 0.93<br>(0.02)        | 0.85<br>(0.04) |

Table 42: Test accuracy with SD for different game variants, using CelebA dataset and over 10 seeds. During test  $\lambda_{\text{test}}$  is set to 0.25.

| Game    | $\lambda$ | $\nu$ | $ \mathbb{C} $ | $ \mathbb{C} $ (test) |                |
|---------|-----------|-------|----------------|-----------------------|----------------|
|         |           |       |                | 1024                  | 4096           |
| LG (SS) | 0         | 0     | 16             | 0.14<br>(0.02)        | 0.06<br>(0.01) |
| LG (SS) | 0         | 0     | 64             | 0.21<br>(0.03)        | 0.11<br>(0.01) |
| LG (SS) | 0         | 0     | 256            | 0.21<br>(0.04)        | 0.12<br>(0.02) |
| LG (SS) | 0         | 0     | 1024           | 0.19<br>(0.03)        | 0.10<br>(0.02) |
| LG (RL) | 0         | 0     | 16             | 0.18<br>(0.06)        | 0.07<br>(0.03) |
| LG (RL) | 0         | 0     | 64             | 0.29<br>(0.05)        | 0.16<br>(0.03) |
| LG (RL) | 0         | 0     | 256            | 0.36<br>(0.06)        | 0.22<br>(0.04) |
| LG (RL) | 0         | 0     | 1024           | 0.41<br>(0.05)        | 0.27<br>(0.04) |
| NLG     | 0.25      | 0     | 16             | 0.43<br>(0.06)        | 0.18<br>(0.04) |
| NLG     | 0.25      | 0     | 64             | 0.71<br>(0.05)        | 0.44<br>(0.06) |
| NLG     | 0.25      | 0     | 256            | 0.87<br>(0.02)        | 0.67<br>(0.04) |
| NLG     | 0.25      | 0     | 1024           | 0.92<br>(0.01)        | 0.77<br>(0.03) |
| MRILG   | 0.25      | -0.5  | 16             | 0.43<br>(0.04)        | 0.18<br>(0.03) |
| MRILG   | 0.25      | -0.5  | 64             | 0.73<br>(0.04)        | 0.46<br>(0.05) |
| MRILG   | 0.25      | -0.5  | 256            | 0.86<br>(0.03)        | 0.65<br>(0.05) |
| MRILG   | 0.25      | -0.5  | 1024           | 0.92<br>(0.01)        | 0.78<br>(0.03) |
| MRILG   | 0.25      | -0.2  | 16             | 0.42<br>(0.05)        | 0.17<br>(0.03) |
| MRILG   | 0.25      | -0.2  | 64             | 0.64<br>(0.23)        | 0.39<br>(0.15) |
| MRILG   | 0.25      | -0.2  | 256            | 0.77<br>(0.27)        | 0.59<br>(0.21) |
| MRILG   | 0.25      | -0.2  | 1024           | 0.90<br>(0.02)        | 0.75<br>(0.03) |
| MRILG   | 0.25      | -0.05 | 16             | 0.36<br>(0.15)        | 0.15<br>(0.07) |
| MRILG   | 0.25      | -0.05 | 64             | 0.64<br>(0.23)        | 0.39<br>(0.15) |
| MRILG   | 0.25      | -0.05 | 256            | 0.83<br>(0.03)        | 0.63<br>(0.05) |
| MRILG   | 0.25      | -0.05 | 1024           | 0.86<br>(0.04)        | 0.72<br>(0.06) |

Table 43: Test accuracy with SD for different game variants, using ImageNet dataset and over 10 seeds. During test  $\lambda_{\text{test}}$  is set to 0.5.

| Game    | $\lambda$ | $\nu$ | $ \mathbb{C} $ | $ \mathbb{C} $ (test) |                |
|---------|-----------|-------|----------------|-----------------------|----------------|
|         |           |       |                | 1024                  | 4096           |
| LG (SS) | 0         | 0     | 16             | 0.03<br>(0.01)        | 0.01<br>(0.00) |
| LG (SS) | 0         | 0     | 64             | 0.04<br>(0.01)        | 0.02<br>(0.01) |
| LG (SS) | 0         | 0     | 256            | 0.06<br>(0.02)        | 0.03<br>(0.01) |
| LG (SS) | 0         | 0     | 1024           | 0.05<br>(0.01)        | 0.03<br>(0.01) |
| LG (RL) | 0         | 0     | 16             | 0.03<br>(0.01)        | 0.01<br>(0.01) |
| LG (RL) | 0         | 0     | 64             | 0.09<br>(0.07)        | 0.05<br>(0.03) |
| LG (RL) | 0         | 0     | 256            | 0.11<br>(0.06)        | 0.06<br>(0.04) |
| LG (RL) | 0         | 0     | 1024           | 0.11<br>(0.02)        | 0.06<br>(0.01) |
| NLG     | 0.5       | 0     | 16             | 0.32<br>(0.02)        | 0.14<br>(0.01) |
| NLG     | 0.5       | 0     | 64             | 0.57<br>(0.02)        | 0.33<br>(0.02) |
| NLG     | 0.5       | 0     | 256            | 0.73<br>(0.01)        | 0.54<br>(0.02) |
| NLG     | 0.5       | 0     | 1024           | 0.82<br>(0.01)        | 0.68<br>(0.02) |
| MRILG   | 0.5       | -0.5  | 16             | 0.33<br>(0.03)        | 0.14<br>(0.02) |
| MRILG   | 0.5       | -0.5  | 64             | 0.59<br>(0.02)        | 0.35<br>(0.02) |
| MRILG   | 0.5       | -0.5  | 256            | 0.75<br>(0.02)        | 0.55<br>(0.03) |
| MRILG   | 0.5       | -0.5  | 1024           | 0.81<br>(0.01)        | 0.66<br>(0.02) |
| MRILG   | 0.5       | -0.2  | 16             | 0.26<br>(0.14)        | 0.11<br>(0.06) |
| MRILG   | 0.5       | -0.2  | 64             | 0.50<br>(0.18)        | 0.29<br>(0.10) |
| MRILG   | 0.5       | -0.2  | 256            | 0.72<br>(0.02)        | 0.51<br>(0.03) |
| MRILG   | 0.5       | -0.2  | 1024           | 0.80<br>(0.01)        | 0.65<br>(0.02) |
| MRILG   | 0.5       | -0.05 | 16             | 0.16<br>(0.12)        | 0.06<br>(0.05) |
| MRILG   | 0.5       | -0.05 | 64             | 0.40<br>(0.21)        | 0.22<br>(0.12) |
| MRILG   | 0.5       | -0.05 | 256            | 0.56<br>(0.30)        | 0.40<br>(0.21) |
| MRILG   | 0.5       | -0.05 | 1024           | 0.62<br>(0.33)        | 0.50<br>(0.26) |



Table 44: Test accuracy with SD for different game variants, using CelebA dataset and over 10 seeds. During test  $\lambda_{\text{test}}$  is set to 0.5.

| Game    | $\lambda$ | $\nu$ | $ \mathbb{C} $ | $ \mathbb{C} $ (test) |                |
|---------|-----------|-------|----------------|-----------------------|----------------|
|         |           |       |                | 1024                  | 4096           |
| LG (SS) | 0         | 0     | 16             | 0.03<br>(0.01)        | 0.01<br>(0.00) |
| LG (SS) | 0         | 0     | 64             | 0.04<br>(0.01)        | 0.02<br>(0.01) |
| LG (SS) | 0         | 0     | 256            | 0.04<br>(0.01)        | 0.02<br>(0.01) |
| LG (SS) | 0         | 0     | 1024           | 0.03<br>(0.01)        | 0.01<br>(0.01) |
| LG (RL) | 0         | 0     | 16             | 0.04<br>(0.02)        | 0.01<br>(0.01) |
| LG (RL) | 0         | 0     | 64             | 0.05<br>(0.02)        | 0.02<br>(0.01) |
| LG (RL) | 0         | 0     | 256            | 0.07<br>(0.03)        | 0.03<br>(0.01) |
| LG (RL) | 0         | 0     | 1024           | 0.08<br>(0.02)        | 0.04<br>(0.01) |
| NLG     | 0.5       | 0     | 16             | 0.26<br>(0.03)        | 0.09<br>(0.02) |
| NLG     | 0.5       | 0     | 64             | 0.46<br>(0.05)        | 0.22<br>(0.04) |
| NLG     | 0.5       | 0     | 256            | 0.64<br>(0.04)        | 0.40<br>(0.04) |
| NLG     | 0.5       | 0     | 1024           | 0.75<br>(0.03)        | 0.55<br>(0.04) |
| MRILG   | 0.5       | -0.5  | 16             | 0.27<br>(0.03)        | 0.10<br>(0.02) |
| MRILG   | 0.5       | -0.5  | 64             | 0.50<br>(0.05)        | 0.25<br>(0.04) |
| MRILG   | 0.5       | -0.5  | 256            | 0.65<br>(0.03)        | 0.40<br>(0.03) |
| MRILG   | 0.5       | -0.5  | 1024           | 0.74<br>(0.03)        | 0.53<br>(0.05) |
| MRILG   | 0.5       | -0.2  | 16             | 0.26<br>(0.06)        | 0.09<br>(0.03) |
| MRILG   | 0.5       | -0.2  | 64             | 0.44<br>(0.16)        | 0.22<br>(0.09) |
| MRILG   | 0.5       | -0.2  | 256            | 0.66<br>(0.03)        | 0.42<br>(0.04) |
| MRILG   | 0.5       | -0.2  | 1024           | 0.72<br>(0.03)        | 0.52<br>(0.05) |
| MRILG   | 0.5       | -0.05 | 16             | 0.17<br>(0.11)        | 0.06<br>(0.04) |
| MRILG   | 0.5       | -0.05 | 64             | 0.36<br>(0.13)        | 0.17<br>(0.07) |
| MRILG   | 0.5       | -0.05 | 256            | 0.52<br>(0.21)        | 0.31<br>(0.14) |
| MRILG   | 0.5       | -0.05 | 1024           | 0.33<br>(0.32)        | 0.23<br>(0.23) |

Table 45: Test accuracy with SD for different game variants, using ImageNet dataset and over 10 seeds. During test  $\lambda_{\text{test}}$  is set to 0.75.

| Game    | $\lambda$ | $\nu$ | $ \mathbb{C} $ | $ \mathbb{C} $ (test) |                |
|---------|-----------|-------|----------------|-----------------------|----------------|
|         |           |       |                | 1024                  | 4096           |
| LG (SS) | 0         | 0     | 16             | 0.00<br>(0.00)        | 0.00<br>(0.00) |
| LG (SS) | 0         | 0     | 64             | 0.01<br>(0.00)        | 0.00<br>(0.00) |
| LG (SS) | 0         | 0     | 256            | 0.01<br>(0.00)        | 0.00<br>(0.00) |
| LG (SS) | 0         | 0     | 1024           | 0.01<br>(0.00)        | 0.00<br>(0.00) |
| LG (RL) | 0         | 0     | 16             | 0.00<br>(0.00)        | 0.00<br>(0.00) |
| LG (RL) | 0         | 0     | 64             | 0.01<br>(0.02)        | 0.01<br>(0.01) |
| LG (RL) | 0         | 0     | 256            | 0.01<br>(0.01)        | 0.01<br>(0.01) |
| LG (RL) | 0         | 0     | 1024           | 0.01<br>(0.00)        | 0.01<br>(0.00) |
| NLG     | 0.75      | 0     | 16             | 0.10<br>(0.01)        | 0.04<br>(0.00) |
| NLG     | 0.75      | 0     | 64             | 0.20<br>(0.01)        | 0.09<br>(0.01) |
| NLG     | 0.75      | 0     | 256            | 0.30<br>(0.01)        | 0.16<br>(0.01) |
| NLG     | 0.75      | 0     | 1024           | 0.36<br>(0.01)        | 0.23<br>(0.01) |
| MRILG   | 0.75      | -0.5  | 16             | 0.11<br>(0.01)        | 0.04<br>(0.00) |
| MRILG   | 0.75      | -0.5  | 64             | 0.22<br>(0.01)        | 0.10<br>(0.01) |
| MRILG   | 0.75      | -0.5  | 256            | 0.31<br>(0.01)        | 0.17<br>(0.01) |
| MRILG   | 0.75      | -0.5  | 1024           | 0.38<br>(0.02)        | 0.23<br>(0.02) |
| MRILG   | 0.75      | -0.2  | 16             | 0.11<br>(0.01)        | 0.04<br>(0.00) |
| MRILG   | 0.75      | -0.2  | 64             | 0.20<br>(0.07)        | 0.09<br>(0.03) |
| MRILG   | 0.75      | -0.2  | 256            | 0.25<br>(0.13)        | 0.13<br>(0.07) |
| MRILG   | 0.75      | -0.2  | 1024           | 0.37<br>(0.01)        | 0.23<br>(0.01) |
| MRILG   | 0.75      | -0.05 | 16             | 0.05<br>(0.05)        | 0.02<br>(0.02) |
| MRILG   | 0.75      | -0.05 | 64             | 0.12<br>(0.11)        | 0.05<br>(0.05) |
| MRILG   | 0.75      | -0.05 | 256            | 0.31<br>(0.01)        | 0.17<br>(0.01) |
| MRILG   | 0.75      | -0.05 | 1024           | 0.23<br>(0.17)        | 0.14<br>(0.11) |

Table 46: Test accuracy with SD for different game variants, using CelebA dataset and over 10 seeds. During test  $\lambda_{\text{test}}$  is set to 0.75.

| Game    | $\lambda$ | $\nu$ | $ \mathbb{C} $ | $ \mathbb{C} $ (test) |                |
|---------|-----------|-------|----------------|-----------------------|----------------|
|         |           |       |                | 1024                  | 4096           |
| LG (SS) | 0         | 0     | 16             | 0.00<br>(0.00)        | 0.00<br>(0.00) |
| LG (SS) | 0         | 0     | 64             | 0.00<br>(0.00)        | 0.00<br>(0.00) |
| LG (SS) | 0         | 0     | 256            | 0.00<br>(0.00)        | 0.00<br>(0.00) |
| LG (SS) | 0         | 0     | 1024           | 0.01<br>(0.00)        | 0.00<br>(0.00) |
| LG (RL) | 0         | 0     | 16             | 0.01<br>(0.00)        | 0.00<br>(0.00) |
| LG (RL) | 0         | 0     | 64             | 0.01<br>(0.00)        | 0.00<br>(0.00) |
| LG (RL) | 0         | 0     | 256            | 0.01<br>(0.00)        | 0.00<br>(0.00) |
| LG (RL) | 0         | 0     | 1024           | 0.01<br>(0.00)        | 0.00<br>(0.00) |
| NLG     | 0.75      | 0     | 16             | 0.09<br>(0.02)        | 0.03<br>(0.01) |
| NLG     | 0.75      | 0     | 64             | 0.17<br>(0.02)        | 0.07<br>(0.01) |
| NLG     | 0.75      | 0     | 256            | 0.25<br>(0.02)        | 0.12<br>(0.02) |
| NLG     | 0.75      | 0     | 1024           | 0.33<br>(0.02)        | 0.19<br>(0.02) |
| MRILG   | 0.75      | -0.5  | 16             | 0.09<br>(0.01)        | 0.03<br>(0.00) |
| MRILG   | 0.75      | -0.5  | 64             | 0.20<br>(0.03)        | 0.08<br>(0.01) |
| MRILG   | 0.75      | -0.5  | 256            | 0.28<br>(0.02)        | 0.13<br>(0.01) |
| MRILG   | 0.75      | -0.5  | 1024           | 0.33<br>(0.02)        | 0.18<br>(0.02) |
| MRILG   | 0.75      | -0.2  | 16             | 0.07<br>(0.04)        | 0.02<br>(0.01) |
| MRILG   | 0.75      | -0.2  | 64             | 0.18<br>(0.02)        | 0.06<br>(0.01) |
| MRILG   | 0.75      | -0.2  | 256            | 0.27<br>(0.02)        | 0.12<br>(0.02) |
| MRILG   | 0.75      | -0.2  | 1024           | 0.30<br>(0.11)        | 0.16<br>(0.06) |
| MRILG   | 0.75      | -0.05 | 16             | 0.05<br>(0.05)        | 0.01<br>(0.02) |
| MRILG   | 0.75      | -0.05 | 64             | 0.15<br>(0.08)        | 0.06<br>(0.03) |
| MRILG   | 0.75      | -0.05 | 256            | 0.22<br>(0.12)        | 0.11<br>(0.06) |
| MRILG   | 0.75      | -0.05 | 1024           | 0.18<br>(0.15)        | 0.10<br>(0.09) |
